# Supplementary material for: Development and psychometric evaluation of a Positive Health measurement scale: a factor analysis study based on a Dutch population
Source: PubMed Central journal article supplement — BMJ Open. 2021 Feb 5;11(2):e040816. doi: 10.1136/bmjopen-2020-040816 (PMC7925905; doi:10.1136/bmjopen-2020-040816), 2021-02-05
Supplement: bmjopen-2020-040816.draft_revisions.pdf [file bmjopen-2020-040816.draft_revisions.pdf]

# BMJ Open

BMJ Open is committed to open peer review. As part of this commitment we make the peer review history of every article we publish publicly available.

When an article is published we post the peer reviewers' comments and the authors' responses online. We also post the versions of the paper that were used during peer review. These are the versions that the peer review comments apply to.

The versions of the paper that follow are the versions that were submitted during the peer review process. They are not the versions of record or the final published versions. They should not be cited or distributed as the published version of this manuscript.

BMJ Open is an open access journal and the full, final, typeset and author-corrected version of record of the manuscript is available on our site with no access controls, subscription charges or pay-per-view fees (<http://bmjopen.bmj.com>).

If you have any questions on BMJ Open's open peer review process please email [info.bmjopen@bmj.com](mailto:info.bmjopen@bmj.com)

# BMJ Open

## Factor analysis of the My Positive Health dialogue tool: the first steps towards a measurement tool

|                               |                                                                                                                                                                                                                                                                         |
|-------------------------------|-------------------------------------------------------------------------------------------------------------------------------------------------------------------------------------------------------------------------------------------------------------------------|
| Journal:                      | <i>BMJ Open</i>                                                                                                                                                                                                                                                         |
| Manuscript ID                 | bmjopen-2020-040816                                                                                                                                                                                                                                                     |
| Article Type:                 | Original research                                                                                                                                                                                                                                                       |
| Date Submitted by the Author: | 22-May-2020                                                                                                                                                                                                                                                             |
| Complete List of Authors:     | Van Vliet, Marja; Institute for Positive Health, Doornenbal, Brian; Salut ; Vrije Universiteit Amsterdam, School of business and economics<br>Boerema, Simone; GGD Twente<br>van den Akker-van Marle, Elske; Leiden University Medical Center, Biomedical Data Sciences |
| Keywords:                     | Quality in health care < HEALTH SERVICES ADMINISTRATION & MANAGEMENT, Health economics < HEALTH SERVICES ADMINISTRATION & MANAGEMENT, PREVENTIVE MEDICINE, PRIMARY CARE, PUBLIC HEALTH, STATISTICS & RESEARCH METHODS                                                   |
|                               |                                                                                                                                                                                                                                                                         |

SCHOLARONE™  
Manuscripts

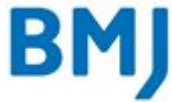

I, the Submitting Author has the right to grant and does grant on behalf of all authors of the Work (as defined in the below author licence), an exclusive licence and/or a non-exclusive licence for contributions from authors who are: i) UK Crown employees; ii) where BMJ has agreed a CC-BY licence shall apply, and/or iii) in accordance with the terms applicable for US Federal Government officers or employees acting as part of their official duties; on a worldwide, perpetual, irrevocable, royalty-free basis to BMJ Publishing Group Ltd ("BMJ") its licensees and where the relevant Journal is co-owned by BMJ to the co-owners of the Journal, to publish the Work in this journal and any other BMJ products and to exploit all rights, as set out in our [licence](#).

The Submitting Author accepts and understands that any supply made under these terms is made by BMJ to the Submitting Author unless you are acting as an employee on behalf of your employer or a postgraduate student of an affiliated institution which is paying any applicable article publishing charge ("APC") for Open Access articles. Where the Submitting Author wishes to make the Work available on an Open Access basis (and intends to pay the relevant APC), the terms of reuse of such Open Access shall be governed by a Creative Commons licence – details of these licences and which [Creative Commons](#) licence will apply to this Work are set out in our licence referred to above.

Other than as permitted in any relevant BMJ Author's Self Archiving Policies, I confirm this Work has not been accepted for publication elsewhere, is not being considered for publication elsewhere and does not duplicate material already published. I confirm all authors consent to publication of this Work and authorise the granting of this licence.

1  
2  
3 **Factor analysis of the My Positive Health dialogue tool: the first steps**  
4 **towards a measurement tool**  
5  
6  
7  
8

9 Marja van Vliet<sup>1</sup>, Brian Doornenbal<sup>2,3</sup>, Simone Boerema<sup>4</sup>, M. Elske van den  
10 Akker-van Marle<sup>5</sup>  
11  
12

13 1 Institute for Positive Health, Utrecht, the Netherlands

14  
15 2 Salut, Arnhem, the Netherlands

16  
17 3 Department of Management and Organisation, School of Business and  
18 Economics, Vrije Universiteit Amsterdam, Amsterdam, the Netherlands

19  
20 4 Municipal health service Twente (GGD Twente), Enschede, the Netherlands

21  
22 5 Department of Biomedical Data Sciences, section Medical Decision Making,  
23 Leiden University Medical Center (LUMC), Leiden, the Netherlands  
24  
25  
26  
27  
28  
29  
30  
31  
32  
33  
34  
35  
36  
37  
38  
39  
40  
41  
42  
43  
44  
45  
46  
47  
48  
49  
50  
51  
52  
53  
54  
55  
56  
57  
58  
59  
60

Corresponding author:

Marja van Vliet, PhD

m.vanvliet@iph.nl

Keywords: Positive Health, population health, validation, patient-reported outcome  
measure, factor analysis, health survey

**Word count:** 3786 words

## Factor analysis of the My Positive Health dialogue tool: the first steps towards a measurement tool

### Abstract

**OBJECTIVES:** The My Positive Health (MPH) dialogue tool is increasingly adopted by healthcare professionals in the Netherlands as well as abroad to support people in their health. Given this trend, the need arises to measure effects of interventions on the Positive Health dimensions. However, the dialogue tool was not developed for this purpose. Therefore, this study aims to work towards a suitable measurement instrument using the My Positive Health (MPH) dialogue tool as starting point.

**DESIGN:** A cross-sectional study design

**PARTICIPANTS AND SETTINGS:** A total of 708 respondents, who were all members of the municipal health service panel in the eastern part of the Netherlands, completed the MPH dialogue tool.

**METHODS:** The factor structure of the MPH dialogue tool was explored through exploratory factor analysis (EFA) using maximum likelihood extraction. Next, the fit of the extracted factor structure was tested through confirmatory factor analysis (CFA). Reliability and discriminant validity of both a new model and the MPH scales was assessed through Cronbach's alpha tests.

**RESULTS:** Similar to the MPH dialogue tool, the extracted 17-item model has a six factor structure but named differently, comprising the factors Physical fitness, Mental functions, Future perspectives, Contentment, Social relations, and Health management. The reliability tests suggest good to very good reliability of the aimed measurement tool and MPH model (Cronbach's alpha values ranging from respectively .820 to .920 and .882 to .933). The measurement model shows acceptable discriminant validity, whereas the MPH model suggests overlap between domains.

**CONCLUSION:** The results suggest that the current MPH dialogue tool seems reliable as a dialogue, but is not suitable as a measurement tool. We therefore propose a 17-item model with improved, acceptable psychometric properties which can serve as a basis for further development of a measurement tool.

### Article Summary

#### Strengths and limitations of this study

\* The study sets the first steps for an additional measurement tool to evaluate interventions with a focus on Positive Health.

\* Data from a large group of respondents (N= 708) with suitable characteristics for factor analysis were used.

\* The study evaluated the reliability of the MPH dialogue tool, which is widely used in the Netherlands.

\* Given the demographic origin and the relatively low response rate (22%) of the sample, the generalizability of the results of the study for the whole Dutch population should be studied.

## Introduction

Over the last years, the European healthcare system is increasingly shifting its focus from cure and disease towards health and healthy behaviour[1, 2]. In the Netherlands, more attention is given to health-oriented approaches, which focus on health promotion, vitality and possibilities rather than on imperfections[3]. This process was accelerated by the demographic situation of an increasing number of elderly people with one or more chronic disease, increasing healthcare expenditures and an increasing wish of citizens for an active and autonomic role during medical consultation[1, 4, 5]. Within the shift towards health-oriented approaches, a focus on health which is broader than only biomedical aspects, and which contributes to achieving a more meaningful life, has gained more interest[6-10]. Furthermore, it is increasingly recognized that understanding patients' experiences about living with a disease, is of vital importance in the management of chronic diseases[11].

Taking this broader focus into mind, Huber et al. (2011)[12] proposed a new concept of health, which describes health "as the ability to adapt and self-manage, in the face of physical, mental and social challenges". According to this concept, being healthy reflects the capacity to deal with internal and external stressors, despite possible limitations – and the tendency to adapt to changing conditions. This opposes to the more static current definition of the WHO, which regards health "as a complete physical, mental and social wellbeing and not merely the absence of disease or infirmity". Although this definition was not intended as such, critics express that the very high ambition has resulted in a major focus on the diagnosis and treatment of symptoms and disease[13-16]. However, people with chronic diseases do not automatically see themselves as being unhealthy[17]. Similarly, many elderly people consider themselves to be healthy, even if their physical abilities are significantly reduced. To them, being healthy often means to have the ability to fulfil one's life[10, 18, 19]. This is fully in line with the content of the new concept of 2011.

The Dutch government considered the dynamic concept of health by Huber et al. (2011)[12] to serve well as a framework for the new strategy within the Dutch healthcare system and required an operationalisation study to make the concept useful for practice[20]. During this study the concept has been further elaborated into the concept of Positive Health, nowadays written with capitals as to express the specific content. The content of the concept is derived from interviews and focus groups with different stakeholder groups (e.g. patients, healthy citizens, healthcare professionals, etc.) This inductive, bottom-up approach enabled the researchers to gain a thorough insight into the perceptions about the health of patients and other stakeholders themselves. Positive Health represents a broad perception of health, expressed by six dimensions with 32 underlying aspects, representing indicators for health. The dimensions were by then named: bodily functions, mental functions and perception, spiritual existential dimension, quality of life, social and societal participation and daily functioning. The six dimensions were visualized in a spider web with six axes, representing these six dimensions and ranging from value 0 (in the centre for poor) to 10 (on the periphery, for excellent). Soon people in practice started to use the spiderweb in dialogue with patients.

Also soon after the spiderweb became available an attempt started to transform the dimensions and 32 aspects into a questionnaire that could serve as a validated outcome measurement instrument to measure Positive Health. However, this attempt failed[21]. The results of the validity study suggested that the tool was not suitable as a measurement instrument[21]. It appeared that the goal of a measurement tool to express outcomes in health in a fixed number was too far from the experienced reality of an individual. Moreover, the 32 items appeared to be rather long for measurement purposes but also interviews made clear that the language of the present spiderweb was too complex for many people. Because of this feedback the six dimensions and the underlying 32 aspects

1  
2  
3 of Positive Health were elaborated by an expert panel group into a more simple language and into  
4 42 aspects, including now (as exceptions) the determinants living conditions and having enough  
5 money. The dimensions were renamed as bodily functions, mental well-being, meaningfulness,  
6 quality of life, participation and daily functioning. The result was called: the My Positive Health  
7 (MPH) dialogue tool (see [www.MijnPositieveGezondheid.nl](http://www.MijnPositieveGezondheid.nl)).  
8  
9

10 This MPH tool aims to provide individuals insight in their own health and stimulate self-reflection. By  
11 completing 42 statements, mean scores for each of the dimensions are graphically displayed in a  
12 spider web. See Supplementary file 1. This spider web can be used during consultations with (for  
13 example) healthcare professionals, to discuss one's perceived health and to reveal one's needs,  
14 desires and abilities.. Thereby it could lead to identifiable statements which would find connection  
15 with the people concerned. This recognition was confirmed by a user evaluation among populations  
16 of healthy citizens, elderly, and chronically ill. The vast majority of the respondents rated the MPH  
17 dialogue tool good to excellent[22]. The tool is widely used in the Netherlands, with more than  
18 100.000 unique users for the digital version since its introduction in 2016 (see  
19 [MijnPositieveGezondheid.nl](http://MijnPositieveGezondheid.nl) ("[MyPositiveHealth.nl](http://MyPositiveHealth.nl)"). In addition, a paper version of the MPH tool is  
20 used across a wide range of care centres.  
21  
22

23  
24 INSERT FIGURE 1 HERE.  
25

26 Along with the extensive use of the dialogue tool, a growing interest is once again observed for a  
27 measurement instrument that measure changes in a person's Positive Health. Such a measurement  
28 tool could provide stakeholders in various domains and levels (e.g. healthcare professionals, national  
29 and local policy makers and insurers) with valid information on the effectiveness of a Positive Health  
30 approach. Such insight could support them during the decision-making process and thereby enable a  
31 more structural implementation of interventions that improve people's (positive) health. As far as we  
32 were aware, since Prinsen no new attempt was made to develop a measurement instrument that  
33 covers the broad concept of Positive Health[23, 24]. Therefore, the objective of this present study  
34 was to set first steps in a new attempt towards a suitable measurement instrument with adequate  
35 psychometric properties and scale brevity. In order to reach this objective, we first aimed to extract  
36 an improved model to measure (positive) health by performing an Exploratory Factor Analysis (EFA)  
37 and to test it through confirmatory factor analysis (CFA). Next, we also aim to determine the  
38 reliability of the MPH dialogue tool.  
39  
40  
41  
42  
43

## 44 **Methods**

### 45 *Design*

46 This study comprised a cross-sectional quantitative survey study. Data from the quantitative survey  
47 was used to develop a new model to measure health by performing an Exploratory Factor Analysis  
48 (EFA) following a confirmatory factor analysis (CFA).  
49  
50  
51  
52  
53

### 54 *The instrument*

55 We use the digital version of the MPH dialogue tool ([MijnPositieveGezondheid.nl](http://MijnPositieveGezondheid.nl);  
56 "[MyPositiveHealth.nl](http://MyPositiveHealth.nl)") in this study. In this digital version, 42 statement are proposed (7 for each  
57 dimension) on an 11-point scale. 0 means totally disagree and 10 means totally agree. Target  
58 population are Dutch citizens, with or without a chronic disease.  
59  
60

### *Participants and data collection*

Members of the citizens' panel of GGD Twente (regional municipal health service) were asked to fill out the 42 questions of the MPH dialogue tool. This panel comprises adults (19+) who took part in the national health survey of GGD Twente in the east of the Netherlands. This survey is carried out every four years to monitor the general state of health of Dutch citizens. At the end of that health survey, the participants were asked whether they were willing to participate in other, future studies by GGD Twente. For the present study, 3218 participants were invited by e-mail to enrol in the study. Of these, 708 participants (46% female, *M* age = 62, *SD* age = 15) completed the questionnaire (response rate is 22%). Data collection took place from January to February 2018.

### *Analytical plan*

To examine the construct validity of the MPH tool, we used a split-half validation method in which we randomly divided the participants into two groups. We used one of these groups to explore the factor structure through exploratory factor analysis (EFA) and the other group to test the goodness of fit of the extracted factor structure through confirmatory factor analysis (CFA). In conducting the factor analyses, we followed best practices described by Brown[25], Costello and Osborne[26], and Cabrera-Nguyen[27].

Through EFA, we explored the factor structure using maximum likelihood (ML) extraction. Because we expected our factors to be interdependent aspects of Positive Health, we used ML extraction with direct oblimin rotation. We considered items with cross loading values of  $\leq .32$  on at least two factors as weak (and thereby as candidates for deletion)[26]. And we considered items with factor loading of  $\geq .60$  as strong[28].

We strove for a model with improved psychometric properties and scale brevity, while maintaining enough items to create stable factors. We therefore aimed to reduce each factor to three items with highest factor loadings.

Through CFA, we evaluated the goodness of fit of the factor structure extracted during EFA. With the CFA evaluation we compared the extracted factor structure with two baseline models containing all 42 items of the MPH dialogue tool: the original 6-factor structure that includes the six dimensions of health and a 1-factor structure which considers all items belonging to one health domain. This comparison helps to understand the degree to which our extracted factor structure fits unseen data better than respectively the original 6-factor structure and the 1-factor structure. We evaluated the goodness of fit using several indices: Pearson's Chi-squared test, comparative fit index (CFI;  $> .95$  is acceptable), Tucker Lewis index (TLI;  $> .95$  is acceptable), the root mean square error of approximation (RMSEA;  $< .06$  is acceptable), and standardized root mean square residual (SRMR;  $< .08$  is acceptable). These indices reflect model fit (Pearson's Chi-squared test), incremental fit (CFI, TLI), and absolute fit (RMSEA, SRMR). The threshold values we applied are cut-off values recommended by Hu and Bentler (1999)[29] and endorsed by both Brown (2014)[25] and Cabrera-Nguyen (2010)[27]. For fitting the models, we used lavaan version 0.6-3[30] in R version 3.5.1[31]. We used maximum likelihood estimation and standardized the latent factors to allow free estimation of all factor loadings.

Finally, we examined the reliability and discriminant validity of the factors of both the original 6-factor model (MPH dialogue tool) and the new experimental model. We examined the reliability by evaluating the Cronbach's alpha coefficients and tested the discriminant validity by evaluating the factor correlations.



### *Ethical considerations*

Due to the harmless and non-invasive character of the study, this study was exempt from medical ethical approval. Prior to completion of the questionnaire, informed consent for the use of data for scientific purposes was asked in the invitation email to the participants. All data are handled anonymously.

## **Results**

### *Exploratory Factor Analysis*

Our exploration showed that the data are suitable for EFA. Our sample had both an acceptable size of 356[32 33] and a very common participant-to-item ratio (8.5:1). The Kaiser–Meyer–Olkin (KMO) statistic of sampling adequacy and the Bartlett’s of sphericity are both positive indicators for EFA suitability as well. The KMO test yielded a statistic of 0.97, implying that the dataset contains a significant number of factors, and the Bartlett’s test of sphericity yielded significant results,  $\chi^2(41) = 318.368, p < .001$ , implying that the correlations among variables are greater than one would expect by chance.

Common approaches for determining the number of factors to extract, showed support for the theoretically suggested 6-factor structure. First, the Kaiser criterion suggests that the data clusters in 6 factors, as they contain 6 factors with eigenvalues greater than one[34 35]. Second, the scree plot (see Figure 1) suggests 2, 4, or 6 factors because the eigenvalues level off after these amount of factors. Third, parallel analysis (see Figure 2), through which one compares the actual scree plot with the possible scree plot based on randomly resampled data, suggest a structure of 6 factors – the crossing point of the two plots. A 6-factor structure account for 67.5% of the total item variance.

INSERT FIGURE 1 HERE.

INSERT FIGURE 2 HERE.

Factor loadings are shown in Table 1. In this table, factor names for the experimental model are displayed in the second horizontal row. Overall, the items that group together in our EFA mostly group together in the original model as well.

Table 1 shows that the first factor has factor loadings above .40 for several items originating from the dimension Social and Societal Participation (SP). These items are: SP29 Social contacts, SP30 Being taken seriously, SP31 Doing fun things together, SP32 Having the support of others, SP33 Belonging. We selected the three highest factor loadings (SP29, SP32, and SP33) and labelled this factor ‘Social relations’.

The second factor showed loadings above .40 on items from the original dimension Daily Functioning (DF). These items are: DF36 Looking after yourself, DF37 Knowing your limitations, DF38 Knowledge of health, DF39 Managing time, DF40 Managing money. We selected the three highest factor loadings (DF37, DF38, DF39) and labelled this factor ‘Daily life-management’.

1  
2  
3 The third factor showed that loadings above .40 were all strong factor loading ( $\geq .60$ ) on items from  
4 the original dimension Bodily Functions (BF). These items are: BF1 Feeling healthy, BF2 Feeling fit,  
5 BF5 Eating pattern, BF6 Physical condition, and BF7 Exercise. We included the three items with  
6 highest factor loadings (BF2, BF6, and BF7) and labelled this factor 'Physical fitness'.

8  
9 The fourth factor showed loadings above .40 on items across three dimensions of the dialogue tool:  
10 Mental Well-being (MW), Meaningfulness (MF), and Quality of Life (QL). These items are: MW11  
11 Being cheerful, MW12 Accepting yourself, MW14 having control, MF16 Being high spirited, and  
12 MF19 Accepting life, QL22 Enjoyment, QL23 Being happy, QL24 Feeling good, and QL25 Feeling well-  
13 balanced. We selected the three highest factor loadings (QL23, QL24, and QL25) and labelled this  
14 factor 'Contentment'.

16  
17 The fifth factor showed loadings above .40 on items from one dimension of the dialogue tool: Mental  
18 Wellbeing (MW) and Meaningfulness (MF). These items are: MW13 Being able to handle changes,  
19 MF17 Wanting to achieve ideals, MF18 Feeling confident about own future, MF21 Continue learning,  
20 and SP34 Doing meaningful things. We selected the three highest factor loadings (MW13, MF17, and  
21 MF18) and labelled this factor 'Future perspectives'.

23  
24 The last factor showed that loadings above .40 were all strong factor loading ( $\geq .60$ ) on items from  
25 one dimension of the dialogue tool: Mental Well-being (MW). These items are: MW8 Being able to  
26 remember things and MW9 Being able to concentrate. We selected these two highest factor loadings  
27 (MW8 and MW9) and labelled this factor 'Mental functioning', as these aspects solely focus on  
28 cognitive abilities and do not concern any emotional aspects or feelings.

30  
31 In our exploration for a measurement instrument model, we were successful in reducing the number  
32 of items for five factors from 7 to 3 items and for one factor to 2 items. The final factor structure we  
33 extracted thus contained 17 items.  
34  
35  
36  
37  
38  
39  
40  
41  
42  
43  
44  
45  
46  
47  
48  
49  
50  
51  
52  
53  
54  
55  
56  
57  
58  
59  
60

Table 1. Factor Pattern/Structure Rotated to the Oblimin Criterion

| Item number* | Description                               | Factor 1         | Factor 2         | Factor 3         | Factor 4    | Factor 5            | Factor 6           | $h^2$ |
|--------------|-------------------------------------------|------------------|------------------|------------------|-------------|---------------------|--------------------|-------|
|              |                                           | Social relations | Daily-management | Physical fitness | Contentment | Future achievements | Mental functioning |       |
| <b>BF1</b>   | <b>Feeling healthy</b>                    | -0.03            | 0.05             | <b>0.82</b>      | 0.12        | -0.02               | 0.03               | 0.807 |
| <b>BF2</b>   | <b>Feeling fit</b>                        | -0.04            | 0.03             | <b>0.86</b>      | 0.12        | -0.07               | 0.07               | 0.826 |
| BF3          | Having complaints or pain                 | 0.10             | -0.07            | 0.37             | -0.11       | 0.10                | 0.13               | 0.250 |
| BF4          | Sleeping pattern                          | 0.10             | -0.10            | 0.36             | 0.25        | 0.01                | 0.21               | 0.464 |
| BF5          | Eating pattern                            | 0.17             | -0.01            | 0.43             | 0.12        | 0.04                | 0.13               | 0.517 |
| BF6          | Physical condition                        | 0.09             | -0.02            | 0.73             | -0.08       | 0.12                | 0.02               | 0.675 |
| <b>BF7</b>   | <b>Exercise</b>                           | 0.02             | 0.09             | <b>0.74</b>      | -0.17       | 0.16                | -0.01              | 0.698 |
| <b>MW8</b>   | <b>Being able to remember things</b>      | -0.03            | -0.01            | 0.00             | -0.08       | 0.01                | <b>0.95</b>        | 0.820 |
| <b>MW9</b>   | <b>Being able to concentrate</b>          | 0.03             | 0.02             | 0.07             | 0.13        | -0.01               | <b>0.77</b>        | 0.817 |
| MW10         | Being able to communicate                 | 0.10             | 0.36             | 0.08             | -0.22       | 0.22                | 0.20               | 0.487 |
| MW11         | Being cheerful                            | 0.24             | 0.03             | 0.12             | 0.46        | 0.07                | 0.19               | 0.775 |
| MW12         | Accepting yourself                        | 0.21             | 0.14             | 0.13             | 0.46        | -0.01               | 0.10               | 0.689 |
| <b>MW13</b>  | <b>Being able to handle changes</b>       | 0.10             | 0.10             | 0.05             | -0.01       | <b>0.48</b>         | 0.11               | 0.506 |
| MW14         | Having control                            | 0.13             | 0.22             | 0.03             | 0.42        | 0.09                | 0.15               | 0.695 |
| MF15         | Having a meaningful life                  | 0.28             | 0.17             | 0.05             | 0.35        | 0.20                | 0.06               | 0.795 |
| MF16         | Being high-spirited                       | 0.13             | 0.13             | 0.20             | 0.41        | 0.17                | 0.08               | 0.784 |
| <b>MF17</b>  | <b>Wanting to achieve ideals</b>          | -0.06            | -0.05            | 0.06             | 0.01        | <b>0.87</b>         | 0.07               | 0.770 |
| <b>MF18</b>  | <b>Feeling confident about own future</b> | 0.12             | 0.03             | 0.01             | 0.19        | <b>0.68</b>         | 0.00               | 0.801 |
| MF19         | Accepting life                            | 0.06             | 0.18             | 0.08             | 0.41        | 0.21                | 0.00               | 0.570 |
| MF20         | Being grateful                            | 0.24             | 0.09             | 0.04             | 0.31        | 0.32                | 0.03               | 0.680 |
| MF21         | Continue learning                         | 0.06             | 0.13             | 0.15             | -0.08       | 0.43                | 0.05               | 0.433 |
| QL22         | Enjoyment                                 | 0.16             | 0.14             | 0.15             | 0.50        | 0.19                | 0.00               | 0.828 |
| <b>QL23</b>  | <b>Being happy</b>                        | 0.11             | 0.13             | 0.08             | <b>0.56</b> | 0.17                | 0.06               | 0.793 |
| <b>QL24</b>  | <b>Feeling good</b>                       | 0.09             | 0.07             | 0.16             | <b>0.58</b> | 0.14                | 0.12               | 0.864 |
| <b>QL25</b>  | <b>Feeling well-balanced</b>              | 0.08             | 0.12             | 0.16             | <b>0.56</b> | 0.13                | 0.11               | 0.852 |

|    |             |                                     |             |             |       |       |             |       |       |
|----|-------------|-------------------------------------|-------------|-------------|-------|-------|-------------|-------|-------|
| 1  |             |                                     |             |             |       |       |             |       |       |
| 2  |             |                                     |             |             |       |       |             |       |       |
| 3  | QL26        | Feeling safe                        | 0.30        | 0.22        | 0.08  | 0.26  | 0.09        | 0.07  | 0.673 |
| 4  | QL27        | Living conditions                   | 0.37        | 0.13        | 0.02  | 0.26  | 0.09        | 0.04  | 0.568 |
| 5  | QL28        | Having enough money                 | 0.24        | 0.34        | 0.11  | -0.10 | 0.15        | 0.05  | 0.480 |
| 6  | <b>SP29</b> | <b>Social contacts</b>              | <b>0.88</b> | 0.02        | 0.00  | -0.08 | 0.04        | 0.05  | 0.819 |
| 7  | SP30        | Being taken seriously               | 0.66        | 0.17        | -0.10 | -0.03 | 0.15        | 0.05  | 0.719 |
| 8  | SP31        | Doing fun things together           | <i>0.81</i> | -0.02       | 0.08  | 0.07  | 0.03        | -0.05 | 0.769 |
| 9  | <b>SP32</b> | <b>Having the support of others</b> | <b>0.88</b> | 0.03        | -0.01 | 0.02  | -0.09       | 0.05  | 0.761 |
| 10 | <b>SP33</b> | <b>Belonging</b>                    | <b>0.88</b> | -0.04       | 0.03  | 0.08  | 0.01        | -0.02 | 0.837 |
| 11 | SP34        | Doing meaningful things             | 0.21        | 0.12        | 0.04  | 0.12  | <i>0.43</i> | 0.04  | 0.629 |
| 12 | SP35        | Being interested in society         | 0.11        | 0.40        | -0.03 | 0.11  | 0.20        | 0.10  | 0.553 |
| 13 | DF36        | Looking after yourself              | 0.13        | <i>0.68</i> | 0.13  | -0.09 | 0.02        | -0.06 | 0.633 |
| 14 | <b>DF37</b> | <b>Knowing your limitations</b>     | -0.06       | <b>0.88</b> | -0.02 | 0.13  | 0.00        | 0.02  | 0.805 |
| 15 | <b>DF38</b> | <b>Knowledge of health</b>          | 0.08        | <b>0.72</b> | 0.20  | -0.03 | -0.03       | -0.03 | 0.714 |
| 16 | <b>DF39</b> | <b>Managing time</b>                | 0.01        | <b>0.71</b> | -0.07 | 0.14  | -0.01       | 0.17  | 0.719 |
| 17 | DF40        | Managing money                      | 0.13        | <i>0.58</i> | 0.02  | -0.08 | 0.07        | 0.15  | 0.623 |
| 18 | DF41        | Being able to work                  | 0.04        | 0.33        | 0.18  | -0.05 | 0.29        | 0.02  | 0.492 |
| 19 | DF42        | Asking for help                     | 0.18        | 0.20        | 0.01  | -0.11 | 0.16        | 0.24  | 0.360 |
| 20 |             |                                     |             |             |       |       |             |       |       |
| 21 |             |                                     |             |             |       |       |             |       |       |
| 22 |             |                                     |             |             |       |       |             |       |       |
| 23 |             |                                     |             |             |       |       |             |       |       |
| 24 |             |                                     |             |             |       |       |             |       |       |
| 25 |             |                                     |             |             |       |       |             |       |       |
| 26 | % of        |                                     |             |             |       |       |             |       |       |
| 27 | variance    |                                     | 15.1        | 12.8        | 11.2  | 10.9  | 10.3        | 7.2   | 67.5  |

Notes: Coefficients greater than |.40| are italicized. The items in bold are retained for that factor.

\* BF refers to Bodily functions; MW refers to Mental well-being; MF refers to meaningfulness; QL refers to Quality of life; SP refers to Social and societal participation; DF refers to daily functioning

### *Confirmatory Factor Analysis*

The two baseline models, against which we compared the factor structure we extracted during our EFA, had low fits. First, the original 6-factor structure had a CFI of .846, TLI of .835, RMSEA of .086 with 90% confidence interval (CI) [.082, .089], and an SRMR of 0.063. Second, the 1-factor structure had a CFI of .731, TLI of .717, RMSEA of .112 with 90% confidence interval (CI) [.109, .115], and an SRMR of 0.066. The factor structure we extracted during the EFA, in contrast, had an acceptable fit, with a CFI of .964, TLI of .953, RMSEA of .071 with 90% confidence interval (CI) [.062, .081], and an SRMR of 0.036. This fit was significantly better than the fit of both the original 6-factor solution ( $\chi^2(700) = 2604.48, p < .001$ ) and the 1-factor solution ( $\chi^2(715) = 4174.19, p < .001$ ).

The items we selected during the EFA all showed positive factor loadings on their respective domains, with standardized coefficients ranging from .714 to .971 (see Table 2), supporting the factor structure. As we report in Table 3, the items within each factor yielded highly consistent response. More specifically, the Cronbach's alpha values of the factors ranged from .820 to .920. The six factors correlated significantly positively among each other (see Table 3), indicating that individuals that score higher on one domain typically score higher on the other domains. The factor correlations did not exceed .80, which suggest acceptable discriminant validity[25]. In comparison, the factor correlations of the original model suggest overlap between Meaningfulness and Mental well-being, Mental well-being and Quality of Life, Quality of life and Meaningfulness, Quality of Life and Social and societal participation, and Social and societal participation and Daily functioning (see Table 4). Cronbach alpha values from this original model range from .882 to .933.

Table 2. Parameter Estimates Confirmatory Factor Analysis

| Latent factor         | Item | Description                        | B     | SE    | Z      | Beta  | p   |
|-----------------------|------|------------------------------------|-------|-------|--------|-------|-----|
| Social relations      | 29   | Social contacts                    | 1.000 | 0.000 |        | 0.844 |     |
| Social relations      | 32   | Having the support of others       | 1.096 | 0.056 | 19.485 | 0.841 | *** |
| Social relations      | 33   | Belonging                          | 1.180 | 0.054 | 21.956 | 0.911 | *** |
| Daily life-management | 37   | Knowing your limitations           | 1.000 | 0.000 |        | 0.892 |     |
| Daily life-management | 38   | Knowledge of health                | 1.046 | 0.039 | 26.516 | 0.933 | *** |
| Daily life-management | 39   | Managing time                      | 1.093 | 0.055 | 19.895 | 0.803 | *** |
| Physical fitness      | 1    | Feeling healthy                    | 1.000 | 0.000 |        | 0.945 |     |
| Physical fitness      | 2    | Feeling fit                        | 1.046 | 0.042 | 24.890 | 0.882 | *** |
| Physical fitness      | 7    | Exercise                           | 1.027 | 0.057 | 17.969 | 0.742 | *** |
| Contentment           | 23   | Being happy                        | 1.000 | 0.000 |        | 0.870 |     |
| Contentment           | 24   | Feeling good                       | 1.104 | 0.043 | 25.949 | 0.938 | *** |
| Contentment           | 25   | Feeling well-balanced              | 1.010 | 0.045 | 22.283 | 0.867 | *** |
| Future perspective    | 13   | Being able to handle changes       | 1.000 | 0.000 |        | 0.714 |     |
| Future perspective    | 17   | Wanting to achieve ideals          | 1.188 | 0.092 | 12.915 | 0.734 | *** |
| Future perspective    | 18   | Feeling confident about own future | 1.321 | 0.089 | 14.902 | 0.863 | *** |
| Mental functioning    | 8    | Being able to remember things      | 1.000 | 0.000 |        | 0.833 |     |
| Mental functioning    | 9    | Being able to concentrate          | 1.148 | 0.059 | 19.528 | 0.971 | *** |

Notes: \*\*\* =  $p < .001$ , B = unstandardized estimates, Beta = standardized estimates.

Table 3. Means, SD, Cronbach's alpha (in correlation matrix diagonal) and correlations of the extracted factors (new model).

1  
2  
3  
4  
5  
6  
7  
8  
9  
10  
11  
12  
13  
14  
15  
16  
17  
18  
19  
20  
21  
22  
23  
24  
25  
26  
27  
28  
29  
30  
31  
32  
33  
34  
35  
36  
37  
38  
39  
40  
41  
42  
43  
44  
45  
46

| <b>Factor</b>             | <b>M</b> | <b>SD</b> | <b>(1)</b> | <b>(2)</b> | <b>(3)</b> | <b>(4)</b> | <b>(5)</b> | <b>(6)</b> |
|---------------------------|----------|-----------|------------|------------|------------|------------|------------|------------|
| (1) Physical fitness      | 7.60     | 1.70      | (.879)     |            |            |            |            |            |
| (2) Mental functions      | 7.76     | 1.58      | .575***    | (.894)     |            |            |            |            |
| (3) Future perspective    | 7.73     | 1.45      | .550***    | .573***    | (.820)     |            |            |            |
| (4) Contentment           | 7.92     | 1.59      | .638***    | .626***    | .730***    | (.920)     |            |            |
| (5) Social relations      | 8.42     | 1.35      | .538***    | .576***    | .640***    | .698***    | (.899)     |            |
| (6) Daily life-management | 8.52     | 1.35      | .573***    | .619***    | .666***    | .691***    | .720***    | (.899)     |

Notes: \*\*\* = p < .001.

For peer review only

Table 4. Means, SD, Cronbach's alpha (in correlation matrix diagonal) and correlations of the original factors (MPH dialogue tool).

| Factor                                | <i>M</i> | <i>SD</i> | (1)     | (2)     | (3)     | (4)     | (5)     | (6)    |
|---------------------------------------|----------|-----------|---------|---------|---------|---------|---------|--------|
| (1) Bodily functions                  | 7.60     | 1.70      | (.882)  |         |         |         |         |        |
| (2) Mental well-being                 | 7.76     | 1.58      | .720*** | (.902)  |         |         |         |        |
| (3) Meaningfulness                    | 7.73     | 1.45      | .650*** | .831*** | (.904)  |         |         |        |
| (4) Quality of life                   | 7.92     | 1.59      | .723*** | .833*** | .875*** | (.921)  |         |        |
| (5) Social and societal participation | 8.42     | 1.35      | .608*** | .767*** | .774*** | .808*** | (.933)  |        |
| (6) Daily functioning                 | 8.52     | 1.35      | .653*** | .786*** | .744*** | .777*** | .815*** | (.901) |

Notes: \*\*\* =  $p < .001$ .



## Discussion

The results of our factor analysis support a factor structure of six dimensions. The model we extracted contained 17 items, comprising the factors Physical fitness, Mental functions, Future perspectives, Contentment, Social relations, and Daily life-management. The extracted model showed improved construct validity compared to the original model with good fit, high reliability and acceptable discriminant validity. For the MPH tool our reliability tests suggest good to very good reliability (Cronbach alpha values ranging from .882 to .933). Furthermore, our factor analysis suggests overlap across the dimensions Mental wellbeing, Meaningfulness, Quality of life, and Social and societal participation, making the MPH tool less suitable as a measurement tool.

This study addresses the difference in aims and thereby required properties between a dialogue tool and a measurement tool. The results show that a 17- item model has better psychometric properties, and can thereby serve as a strong basis for the development of a Positive Health measure. However, the 17- item scale neglects several aspects relevant to address when determining and discussing an individual's perception of health. For example, for bodily functions, the ignored items about sleeping and eating patterns can inspire ideas and improve dialogue about improving bodily functions. Similarly, it ignores the aspect *accepting yourself*, whereas this was considered the most important aspect of Mental wellbeing by respondents (18-25 years) in a study that focused on the development of an adolescent version of the tool[36]. Importance of this aspect came forward in studies regarding the development of health-related quality of life and subjective well-being scales as well[6, 37]. Furthermore, research shows that poor living conditions and financial problems are often accompanied by considerable physical and mental problems[38-40]. Inclusion of these aspects in the MPH dialogue tool provides a broader understanding of the multiple needs of an individual. This enables individuals to express their needs during the dialogue about the results and enables to refer them, if required, to appropriate providers. Overall, for two statements within the MPH dialogue tool it can be argued that they also function as determinants - which influence people's perceived health – like patients themselves expressed during the original study, or consequences of health as well. While such determinants and consequences of health are not appropriately represented in the measurement of health itself, we suggest that they may still be relevant in a dialogue tool.

Difficulties to blend the two goals of both a dialogue tool and a measurement tool were noted earlier. During the development process, an attempt to transform the dimensions and underlying aspects into a questionnaire that could serve as a validated outcome measurement instrument to measure Positive Health has failed[21]. At this stage it appeared that the goal of a measurement tool to express outcome in health in (a) fixed number(-s) was too far from the experienced reality of an individual. Based on the results of our study and the previous attempt, we therefore suggest the use of two separate tools: (1) a dialogue tool with the aim to elucidate a broad representation of a person's perceived health status, comprising a broad range of aspects and (2) a measurement tool with improved psychometric properties that is able to capture broad health in a valid and reliable way. For this second purpose, our extracted 17- item model may serve as a basis.

When further developing a measurement tool to the measure (positive) health, several issues need to be addressed. First, concepts like salutogenesis, sense of coherence, and resilience form a strong basis of Positive Health, focussing on the abilities of individuals to handle changes and experience meaningfulness. It should be further investigated whether these concepts are sufficiently addressed in

1  
2  
3 the current 17-item experimental model. For example, the included aspects from the dimension of  
4 Meaningfulness solely focus on future achievements, while meaningfulness can be regarded as an  
5 integration of past, present and future[41]. Second, in line with the concept of health as the ability to  
6 adapt and to self-manage, one could expect that an individual with poor objective health status can still  
7 experience good health when being capable to deal well with the situation, while another individual with  
8 better objective health status can experience lower health. It would be a challenge to develop a  
9 measurement tool that does not reflect health by one continuum, but that can capture both realities.

### 12 *Methodological considerations*

14 This study was based on a survey among a citizen panel in eastern part of the Netherlands, with a mean  
15 age of 62 ( $SD = 15$ ) and 46% women. This relatively higher age of the study population compared to the  
16 whole adult population in this region (M age = 51) may be the result of the relatively low response rate  
17 of 22%. To be able to draw more firm conclusions about the psychometric properties of the MPH tool,  
18 this should be investigated among other populations as well.

21 In our study we have focused on the construct validity. Therefore, other psychometric properties such as  
22 the predictive validity and discriminant validity of the 17- item model remain still unknown. Such issues  
23 should be addressed in future studies. Also, we made a first attempt to label the identified factors with  
24 factor names. The appropriateness of these names should be further investigated.

26 We based the choice to select three items per factor on both practical and theoretical arguments. From  
27 practical point of view, it is desirable to have a short and easy to use scale with acceptable psychometric  
28 properties. A scale of 17 items can be completed within a short amount of time. From a theoretical  
29 perspective, factors with fewer than three items are often weak and unstable[26].

### 32 *Conclusion*

34 Overall, we conclude that the overall structure of the MPH dialogue tool, seems reliable. While the 42-  
35 item model might be suitable as a dialogue tool, this study shows that it is not suitable as a  
36 measurement tool. Instead, we propose a 17-item model with a six factor structure, comprising the  
37 factors Physical fitness, Mental functions, Future perspective, Contentment, Social relations, and Daily  
38 life-management, which can serve as a basis for the development of an additional measurement tool.  
39 Given the prevailing healthcare trend towards a focus on health and wellbeing, expressed by an  
40 increased number of practices based on a Positive Health approach, the existence of such measurement  
41 tool is of great importance.

### 46 **Author contributions**

47 SB collected the data. BD performed the statistical analysis. MV interpreted the results and wrote the  
48 manuscript in collaboration with BD and EA. All authors commented and agreed on the final version.

### 51 **Funding Statement**

52 This research received no specific grant from any funding agency in the public, commercial or non-profit  
53 sector.

### 56 **Competing interest**

The authors declare no conflict of interest.

### Data sharing statement

A request for sharing data can be made by sending an email to the corresponding author.

### References

1. Johansen F, Loorbach D, Stoopendaal A. Exploring a transition in Dutch healthcare. *J Health Organ Manag* 2018;32(7):875-90 doi: 10.1108/JHOM-07-2018-0185.
2. Palmer K, Marengoni A, Forjaz MJ, et al. Multimorbidity care model: Recommendations from the consensus meeting of the Joint Action on Chronic Diseases and Promoting Healthy Ageing across the Life Cycle (JA-CHRODIS). *Health Policy* 2018;122(1):4-11 doi: 10.1016/j.healthpol.2017.09.006.
3. Hoeymans N, Van Loon AJM, Van den Berg M, et al. A healthier Netherlands: the key findings of the sixth Public Health Status and Foresight Bilthoven, The Netherlands: National Institute for Public Health and the environment (RIVM), 2014.
4. Barnett K, Mercer SW, Norbury M, Watt G, Wyke S, Guthrie B. Epidemiology of multimorbidity and implications for health care, research, and medical education: A cross-sectional study. *Lancet* 2012;380(9836):37-43 doi: 10.1016/S0140-6736(12)60240-2.
5. Butalid L, Verhaak PF, Boeije HR, Bensing JM. Patients' views on changes in doctor-patient communication between 1982 and 2001: a mixed-methods study. *BMC Fam Pract* 2012;13:80 doi: 10.1186/1471-2296-13-80.
6. De Vries M, Emons WHM, Plantinga A, et al. Comprehensively Measuring Health-Related Subjective Well-Being: Dimensionality Analysis for Improved Outcome Assessment in Health Economics. *Value Health* 2016;19(2):167-75 doi: 10.1016/j.jval.2015.11.010.
7. Al-Janabi H, Flynn TN, Coast J. Development of a self-report measure of capability wellbeing for adults: the ICECAP-A. *Qual Life Res* 2012;21(1):167-76 doi: 10.1007/s11136-011-9927-2.
8. NWA. Portfolio for research and innovation - Health care research, sickness prevention and treatment. The Hague, 2016.
9. Smid HJ, Wydoodt A. ZonMW signalement over zingeving in zorg: de mens centraal [ZonMW description about meaningfulness in care: focus on the individual]. 2nd edition ed. Den Haag: ZonMw, 2017.
10. Vanderweele TJ. On the promotion of human flourishing. *Proc Natl Acad Sci U S A*, 2017:8148-56 doi: 10.1073/pnas.1702996114.
11. Stucki G, Bickenbach J. Health, Functioning, and Well-being: Individual and Societal. *Arch Phys Med Rehabil* 2019;100(9):1788-92 doi: 10.1016/j.apmr.2019.03.004.
12. Huber M, Knottnerus A, Green L, et al. How should we define health? *BMJ* 2011;343(7817):1-3 doi: 10.1136/bmj.d4163.
13. Editorial. What is health? The ability to adapt. *Lancet* 2009;373(9666):781-81 doi: 10.1016/S0140-6736(09)60456-6.
14. Jadad AR, O'Grady L. How should health be defined? *BMJ* 2008;337:a2900 doi: 10.1136/bmj.a2900.
15. Larson JS. The conceptualization of health. *Med Care Res Rev* 1999;56:123-36 doi: 10.1177/107755879905600201.

16. Smith R. The end of disease and the beginning of health - *BMJ*, 2008.
17. Van der Lucht F, Polder JJ. Towards better health - The Dutch 2010 Public Health Status and Forecasts Report. Bilthoven: RIVM, 2010.
18. Bircher J. Towards a dynamic definition of health and disease. *Med Health Care Philos* 2005;8(3):335-41 doi: 10.1007/s11019-005-0538-y.
19. Kooiker SE. Nederlanders aan het woord over gezondheid en gezond leven. Achtergrond bij VTV 2010 Van Gezond naar Beter [Stories from Dutch citizens about health and healthy living. Background to the Dutch 2010 Public Health Status and Forecasts Report]. Bilthoven: RIVM, 2011.
20. Huber M, van Vliet M, Giezenberg M, et al. Towards a 'patient-centred' operationalisation of the new dynamic concept of health: a mixed methods study. *BMJ open* 2016;6(1):e010091 doi: 10.1136/bmjopen-2015-010091.
21. Prinsen CAC, Terwee CB. Measuring positive health: for now, a bridge too far. *Public Health* 2019;170:70-77 doi: 10.1016/j.puhe.2019.02.024.
22. Al Shamma S, Van den Dries L, Van Wezep M, Wolf J. Ervaringen met de gesprekstoel 'Mijn Positieve Gezondheid' [Experiences with the dialogue tool 'My Positive Health']. Nijmegen, 2018:1-40.
23. Hendriks RJP, Spreeuwenberg MD, Drewes HW, Ruwaard D, Baan CA. How to Measure Population Health: An Exploration Toward an Integration of Valid and Reliable Instruments This study was presented as a poster presentation at the International Conference on Integrated Care 2017, held May 8–10, 2017 in Dublin, Ireland. *Popul Health Manag* 2018;21(4):323-30 doi: 10.1089/pop.2017.0097.
24. Linton M, Dieppe P, Medina-Lara A. Review of 99 self-report measures for assessing well-being in adults: exploring dimensions of well-being and developments over time. *BMJ open* 2016;6(7):e010641-e41 doi: 10.1136/bmjopen-2015-010641.
25. Brown TA. Confirmatory factor analysis for applied research. New York, NY: The Guilford Press, 2014.
26. Costello AB, Osborne JW. Best practices in exploratory factor analysis: Four recommendations for getting the most from your analysis. *Pract Assess Res Eval* 2005;10:1-9 doi: 10.1.1.110.9154.
27. Cabrera-Nguyen P. Author Guidelines for Reporting Scale Development and Validation Results in the Journal of the Society for Social Work and Research. *J Soc Social Work Res* 2010;1(2):99-103 doi: 10.5243/jsswr.2010.8.
28. Garson GD. Factor Analysis. Asheboro, NC: Statistical Associates Publishers, 2013.
29. Hu L, Bentler PM. Cutoff criteria for fit indexes in covariance structure analysis: Conventional criteria versus new alternatives. *Struct Equ Modeling* 1999;6(1):1-55 doi: 10.1080/10705519909540118.
30. Rosseel Y. Lavaan: An R package for structural equation modeling. *J Stat Softw* 2012;48(2):1-36
31. Team RC. R: A Language and Environment for Statistical Computing. Vienna: R Foundation for Statistical Computing, 2018.
32. Comrey AL, Lee HB. A First Course in Factor Analysis. Hillsdale, NJ: Lawrence Erlbaum, 1992.
33. Worthington RL, Whittaker TA. Scale development research: A content analysis and recommendations for best practices. *Couns Psychol* 2006;34(6):806-38
34. Kaiser HF. The Application of Electronic Computers to Factor Analysis. *Educ Psychol Meas* 1960;20(1):141-51 doi: 10.1177/001316446002000116.
35. Kaiser HF, Rice J. Little Jiffy, Mark Iv. *Educ Psychol Meas* 1974;34(1):111-17 doi: 10.1177/001316447403400115.
36. Van Vliet M, Van der Zanden S, Huber M. Ontwikkeling van de 'Mijn Positieve Gezondheid' jongerentool [Development of the My Positive Health adolescent tool]. Utrecht: Institute for Positive Health, 2019.
37. Pietersma S, de Vries M, van den Akker-van Marle ME. Domains of quality of life: results of a three-stage Delphi consensus procedure among patients, family of patients, clinicians, scientists and the general public. *Qual Life Res* 2014;23(5):1543-56 doi: 10.1007/s11136-013-0578-3.

- 1  
2  
3 38. Bodden DHM, Deković M. Multiproblem Families Referred to Youth Mental Health: What's in a  
4 Name? *Fam Process* 2016;55(1):31-47 doi: 10.1111/famp.12144.  
5  
6 39. Moorhead R, Robinson M. A trouble shared – legal problems clusters in solicitors' and advice  
7 agencies. London: Department for Constitutional Affairs, 2006.  
8  
9 40. Smith M, Buck A, Sidaway J, Scanlan L. Bridging the Empirical Gap: New Insights into the Experience  
10 of Multiple Legal Problems and Advice Seeking. *J Empir Leg Stud* 2013;10(1):146-70 doi:  
11 10.1111/jels.12006.  
12  
13 41. Baumeister RF, Vohs KD, Aaker JL, Garbinsky EN. Some key differences between a happy life and a  
14 meaningful life. *J Posit Psychol* 2013;8(6):505-16 doi: 10.1080/17439760.2013.830764.  
15  
16  
17  
18  
19  
20  
21  
22  
23  
24  
25  
26  
27  
28  
29  
30  
31  
32  
33  
34  
35  
36  
37  
38  
39  
40  
41  
42  
43  
44  
45  
46  
47  
48  
49  
50  
51  
52  
53  
54  
55  
56  
57  
58  
59  
60

For peer review only

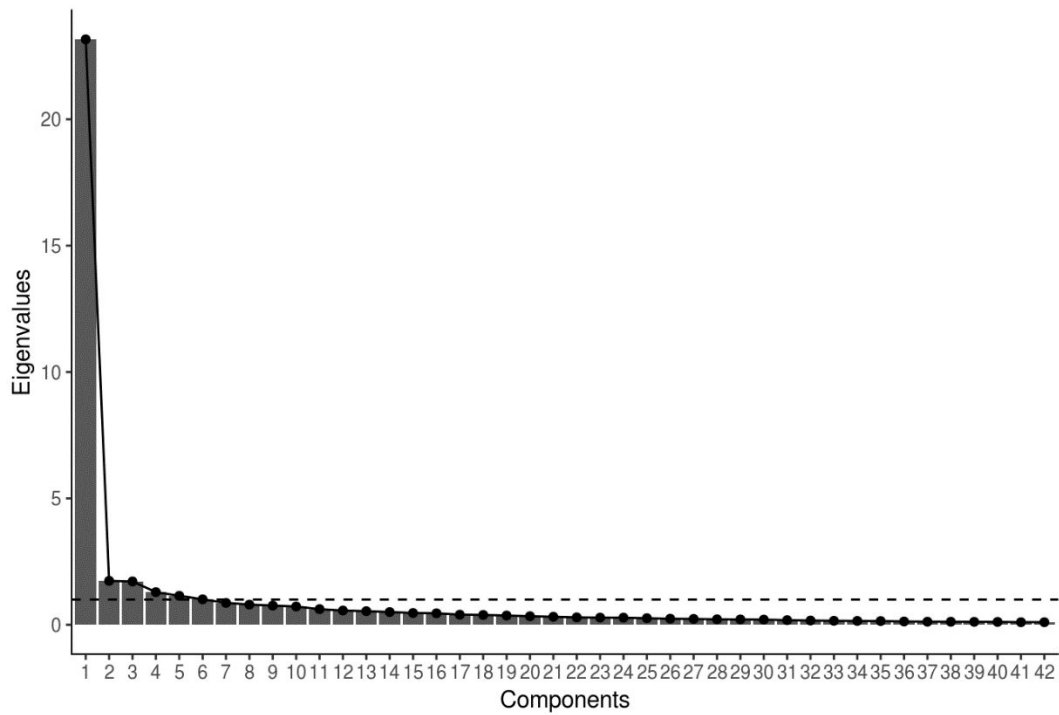

Figure 1. Scree plot. Note: Kaiser criterion is shown by the black dashed line.

review only

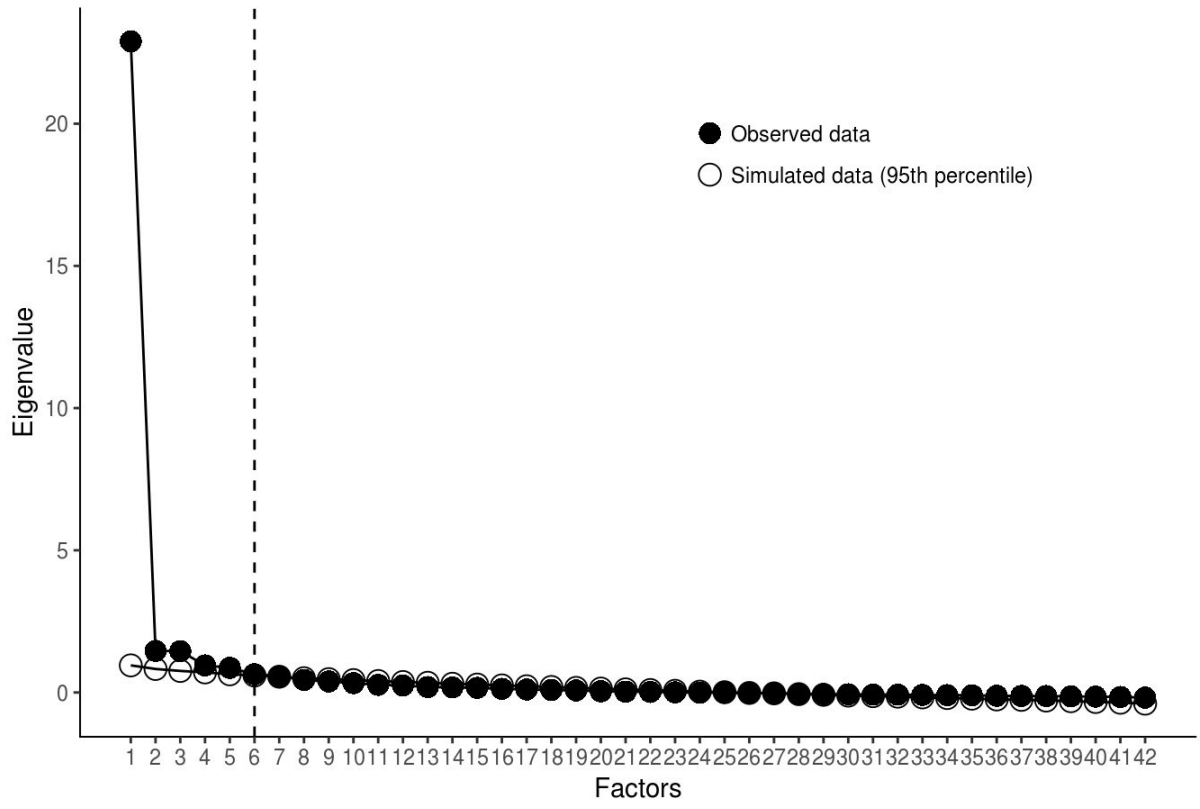

Figure 2. Parallel Analysis. Note: The 6-factor structure is shown by the black dashed line.

Review only

**MY  
POSITIVE  
HEALTH**

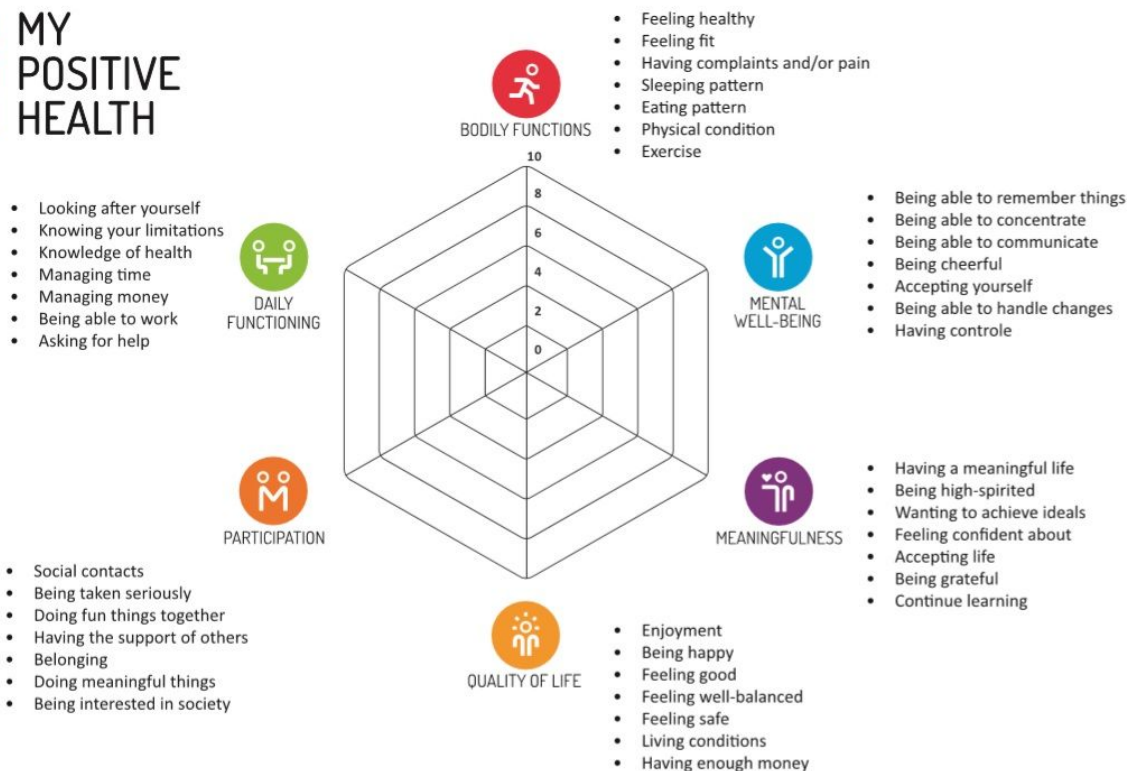

Institute for Positive Health (IPH) | Dialogue tool 1.0

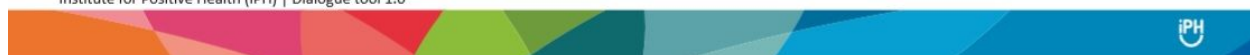

Supplementary file 1. My Positive Health spiderweb comprising 6 dimensions and 42 aspects

Review only



# BMJ Open

## Factor analysis of the My Positive Health dialogue tool: the first steps towards a measurement tool

|                                 |                                                                                                                                                                                                                                                                         |
|---------------------------------|-------------------------------------------------------------------------------------------------------------------------------------------------------------------------------------------------------------------------------------------------------------------------|
| Journal:                        | <i>BMJ Open</i>                                                                                                                                                                                                                                                         |
| Manuscript ID                   | bmjopen-2020-040816.R1                                                                                                                                                                                                                                                  |
| Article Type:                   | Original research                                                                                                                                                                                                                                                       |
| Date Submitted by the Author:   | 25-Nov-2020                                                                                                                                                                                                                                                             |
| Complete List of Authors:       | Van Vliet, Marja; Institute for Positive Health, Doornenbal, Brian; Salut ; Vrije Universiteit Amsterdam, School of business and economics<br>Boerema, Simone; GGD Twente<br>van den Akker-van Marle, Elske; Leiden University Medical Center, Biomedical Data Sciences |
| <b>Primary Subject Heading</b>: | Public health                                                                                                                                                                                                                                                           |
| Secondary Subject Heading:      | Research methods, Health services research, Patient-centred medicine, Health informatics                                                                                                                                                                                |
| Keywords:                       | Quality in health care < HEALTH SERVICES ADMINISTRATION & MANAGEMENT, Health economics < HEALTH SERVICES ADMINISTRATION & MANAGEMENT, PREVENTIVE MEDICINE, PRIMARY CARE, PUBLIC HEALTH, STATISTICS & RESEARCH METHODS                                                   |
|                                 |                                                                                                                                                                                                                                                                         |

SCHOLARONE™  
Manuscripts



I, the Submitting Author has the right to grant and does grant on behalf of all authors of the Work (as defined in the below author licence), an exclusive licence and/or a non-exclusive licence for contributions from authors who are: i) UK Crown employees; ii) where BMJ has agreed a CC-BY licence shall apply, and/or iii) in accordance with the terms applicable for US Federal Government officers or employees acting as part of their official duties; on a worldwide, perpetual, irrevocable, royalty-free basis to BMJ Publishing Group Ltd ("BMJ") its licensees and where the relevant Journal is co-owned by BMJ to the co-owners of the Journal, to publish the Work in this journal and any other BMJ products and to exploit all rights, as set out in our [licence](#).

The Submitting Author accepts and understands that any supply made under these terms is made by BMJ to the Submitting Author unless you are acting as an employee on behalf of your employer or a postgraduate student of an affiliated institution which is paying any applicable article publishing charge ("APC") for Open Access articles. Where the Submitting Author wishes to make the Work available on an Open Access basis (and intends to pay the relevant APC), the terms of reuse of such Open Access shall be governed by a Creative Commons licence – details of these licences and which [Creative Commons](#) licence will apply to this Work are set out in our licence referred to above.

Other than as permitted in any relevant BMJ Author's Self Archiving Policies, I confirm this Work has not been accepted for publication elsewhere, is not being considered for publication elsewhere and does not duplicate material already published. I confirm all authors consent to publication of this Work and authorise the granting of this licence.

1  
2  
3 **Factor analysis of the My Positive Health dialogue tool: the first steps**  
4 **towards a measurement tool**  
5  
6  
7  
8

9 Marja van Vliet<sup>1</sup>, Brian Doornenbal<sup>2,3</sup>, Simone Boerema<sup>4</sup>, M. Elske van den  
10 Akker-van Marle<sup>5</sup>  
11

12  
13 1 Institute for Positive Health, Utrecht, the Netherlands

14  
15 2 Salut, Arnhem, the Netherlands

16  
17 3 Department of Management and Organisation, School of Business and  
18 Economics, Vrije Universiteit Amsterdam, Amsterdam, the Netherlands

19  
20 4 Municipal health service Twente (GGD Twente), Enschede, the Netherlands

21  
22 5 Department of Biomedical Data Sciences, section Medical Decision Making,  
23 Leiden University Medical Center (LUMC), Leiden, the Netherlands  
24  
25  
26  
27  
28  
29  
30  
31  
32  
33  
34  
35  
36  
37  
38  
39  
40  
41  
42  
43  
44  
45  
46  
47  
48  
49  
50  
51  
52  
53  
54  
55  
56  
57  
58  
59  
60

Corresponding author:

Marja van Vliet, PhD

m.vanvliet@iph.nl

Keywords: Positive Health, population health, validation, patient-reported outcome  
measure, factor analysis, health survey

**Word count:** 4108 words

## Factor analysis of the My Positive Health dialogue tool: the first steps towards a measurement tool

### Abstract

**OBJECTIVES:** The My Positive Health (MPH) dialogue tool is increasingly adopted by healthcare professionals in the Netherlands as well as abroad to support people in their health. Given this trend, the need arises to measure effects of interventions on the Positive Health dimensions. However, the dialogue tool was not developed for this purpose. Therefore, this study aims to work towards a suitable measurement instrument using the My Positive Health (MPH) dialogue tool as starting point.

**DESIGN:** A cross-sectional study design

**PARTICIPANTS AND SETTINGS:** A total of 708 respondents, who were all members of the municipal health service panel in the eastern part of the Netherlands, completed the MPH dialogue tool.

**METHODS:** The factor structure of the MPH dialogue tool was explored through exploratory factor analysis (EFA) using maximum likelihood extraction. Next, the fit of the extracted factor structure was tested through confirmatory factor analysis (CFA). Reliability and discriminant validity of both a new model and the MPH scales was assessed through Cronbach's alpha tests.

**RESULTS:** Similar to the MPH dialogue tool, the extracted 17-item model has a six factor structure but named differently, comprising the factors Physical fitness, Mental functions, Future perspectives, Contentment, Social relations, and Health management. The reliability tests suggest good to very good reliability of the aimed measurement tool and MPH model (Cronbach's alpha values ranging from respectively .820 to .920 and .882 to .933). The measurement model shows acceptable discriminant validity, whereas the MPH model suggests overlap between domains.

**CONCLUSION:** The results suggest that the current MPH dialogue tool seems reliable as a dialogue, but is not suitable as a measurement tool. We therefore propose a 17-item model with improved, acceptable psychometric properties which can serve as a basis for further development of a measurement tool.

### Article Summary

#### Strengths and limitations of this study

\* The study sets the first steps for an additional measurement tool to evaluate interventions with a focus on Positive Health.

\* Data from a large group of respondents (N= 708) with suitable characteristics for factor analysis were used.

\* The study evaluated the reliability of the MPH dialogue tool, which is widely used in the Netherlands.

\* Given the demographic origin and the relatively low response rate (22%) of the sample, the generalizability of the results of the study for the whole Dutch population should be studied.

## Introduction

Over the last years, the European healthcare system is increasingly shifting its focus from cure and disease towards health and healthy behaviour[1, 2]. In the Netherlands, more attention is given to health-oriented approaches, which focus on health promotion, vitality and possibilities rather than on imperfections[3]. This process was accelerated by the demographic situation of an increasing number of elderly people with one or more chronic disease, increasing healthcare expenditures and an increasing wish of citizens for an active and autonomic role during medical consultation[1, 4, 5]. Within the shift towards health-oriented approaches, a focus on health which is broader than only biomedical aspects, and which contributes to achieving a more meaningful life, has gained more interest[6-10]. Furthermore, it is increasingly recognized that understanding patients' experiences about living with a disease, is of vital importance in the management of chronic diseases[11].

Taking this broader focus into mind, Huber et al. (2011)[12] proposed a new concept of health, which describes health "as the ability to adapt and self-manage, in the face of physical, mental and social challenges". According to this concept, being healthy reflects the capacity to deal with internal and external stressors, despite possible limitations – and the tendency to adapt to changing conditions. This opposes to the more static current definition of the WHO, which regards health "as a complete physical, mental and social wellbeing and not merely the absence of disease or infirmity". Although this definition was not intended as such, critics express that the very high ambition has resulted in a major focus on the diagnosis and treatment of symptoms and disease[13-16]. However, people with chronic diseases do not automatically see themselves as being unhealthy[17]. Similarly, many elderly people consider themselves to be healthy, even if their physical abilities are significantly reduced. To them, being healthy often means to have the ability to fulfil one's life[10, 18, 19]. This is fully in line with the content of the new concept of 2011.

The Dutch government considered the dynamic concept of health by Huber et al. (2011)[12] to serve well as a framework for the new strategy within the Dutch healthcare system and required an operationalisation study to make the concept useful for practice[20]. During this study the concept has been further elaborated into the concept of Positive Health, nowadays written with capitals as to express the specific content. The content of the concept is derived from interviews and focus groups with different stakeholder groups (e.g. patients, healthy citizens, healthcare professionals, etc.) This inductive, bottom-up approach enabled the researchers to gain a thorough insight into the perceptions about the health of patients and other stakeholders themselves. Positive Health represents a broad perception of health, expressed by six dimensions with 32 underlying aspects, representing indicators for health. The dimensions were by then named: bodily functions, mental functions and perception, spiritual existential dimension, quality of life, social and societal participation and daily functioning. The six dimensions were visualized in a spider web with six axes, representing these six dimensions and ranging from value 0 (in the centre for poor) to 10 (on the periphery, for excellent). Soon people in practice started to use the spiderweb in dialogue with patients.

Also soon after the spiderweb became available an attempt started to transform the dimensions and 32 aspects into a questionnaire that could serve as a validated outcome measurement instrument to measure Positive Health. However, this attempt failed[21]. The results of the validity study suggested that the tool was not suitable as a measurement instrument[21]. It appeared that the goal of a measurement tool to express outcomes in health in a fixed number was too far from the experienced reality of an individual. Moreover, the 32 items appeared to be rather long for measurement purposes but also interviews made clear that the language of the present spiderweb was too complex for many people. Because of this feedback the six dimensions and the underlying 32 aspects

1  
2  
3 of Positive Health were elaborated by an expert panel group into a more simple language and into  
4 42 aspects, including now (as exceptions) the determinants living conditions and having enough  
5 money. The dimensions were renamed as bodily functions, mental well-being, meaningfulness,  
6 quality of life, participation and daily functioning. The result was called: the My Positive Health  
7 (MPH) dialogue tool (see [www.MijnPositieveGezondheid.nl](http://www.MijnPositieveGezondheid.nl)).  
8  
9

10 This MPH tool aims to provide individuals insight in their own health and stimulate self-reflection. By  
11 completing 42 statements, mean scores for each of the dimensions are graphically displayed in a  
12 spider web. See Supplementary file 1. This spider web can be used during consultations with (for  
13 example) healthcare professionals, to discuss one's perceived health and to reveal one's needs,  
14 desires and abilities. Thereby it could lead to identifiable statements which would find connection  
15 with the people concerned. This recognition was confirmed by a user evaluation among populations  
16 of healthy citizens, elderly, and chronically ill. The vast majority of the respondents rated the MPH  
17 dialogue tool good to excellent[22]. The tool is widely used in the Netherlands, with more than  
18 100.000 unique users for the digital version since its introduction in 2016 (see  
19 [MijnPositieveGezondheid.nl](http://MijnPositieveGezondheid.nl) ("[MyPositiveHealth.nl](http://MyPositiveHealth.nl)"). In addition, a paper version of the MPH tool is  
20 used across a wide range of care centres.  
21  
22

23  
24 INSERT SUPPLEMENTARY FILE 1 HERE.  
25

26 Along with the extensive use of the dialogue tool, a growing interest is once again observed for a  
27 measurement instrument that measure changes in a person's Positive Health. Such a measurement  
28 tool could provide stakeholders in various domains and levels (e.g. healthcare professionals, national  
29 and local policy makers and insurers) with valid information on the effectiveness of a Positive Health  
30 approach. Such insight could support them during the decision-making process and thereby enable a  
31 more structural implementation of interventions that improve people's (positive) health. As far as we  
32 were aware, no other validated questionnaire is available that covers the broad concept of Positive  
33 Health and since Prinsen no new attempt was made to develop such measurement instrument [23,  
34 24]. The objective of this present study was to set first steps in a new attempt towards a suitable  
35 measurement instrument with adequate psychometric properties and scale brevity. This instrument  
36 could meet the needs of professionals wishing to evaluate their Positive Health interventions. In  
37 order to reach this objective, we aimed to extract an improved model to measure (positive) health by  
38 performing an Exploratory Factor Analysis (EFA) and to test it through confirmatory factor analysis  
39 (CFA). Performing a factor analysis will not only help to identify items to measure (positive) health, it  
40 will also provide insight into the adequacy of the current arrangement of dimensions and aspects of  
41 the MPH dialogue tool. Furthermore, we also aimed to examine the reliability of the MPH dialogue  
42 tool.  
43  
44  
45  
46  
47  
48

## 49 **Methods**

### 50 *Design*

51 This study comprised a cross-sectional quantitative survey study. Data from the quantitative survey  
52 was used to develop a new model to measure health by performing an Exploratory Factor Analysis  
53 (EFA) following a confirmatory factor analysis (CFA).  
54  
55  
56  
57  
58

### 59 *The instrument*

We use the digital version of the MPH dialogue tool (MijnPositieveGezondheid.nl; “MyPositiveHealth.nl”) in this study. In this digital version, 42 statement are proposed (7 for each dimension) on an 11-point scale. 0 means totally disagree and 10 means totally agree. Target population are Dutch citizens, with or without a chronic disease.

### *Participants and data collection*

Members of the citizens’ panel of GGD Twente (regional municipal health service) were asked to fill out the 42 questions of the MPH dialogue tool and were asked for their age, gender, educational level, poverty (difficulty getting around), and health literacy (difficulty understanding health information such as leaflets). This panel comprises adults (19+) who took part in the national health survey of GGD Twente in the east of the Netherlands. This survey is carried out every four years to monitor the general state of health of Dutch citizens. At the end of that health survey, the participants were asked whether they were willing to participate in other, future studies by GGD Twente. Participants were invited by email to complete the questionnaire. Data collection took place from January to February 2018.

### *Analytical plan*

To examine the construct validity of the MPH tool, we used a split-half validation method in which we randomly divided the participants into two groups. We used one of these groups to explore the factor structure through exploratory factor analysis (EFA) and the other group to test the goodness of fit of the extracted factor structure through confirmatory factor analysis (CFA). In conducting the factor analyses, we followed best practices described by Brown[25], Costello and Osborne[26], and Cabrera-Nguyen[27]. Suitability of the data for EFA was examined based on the Kaiser–Meyer–Olkin (KMO) statistic of sampling adequacy and the Bartlett’s test of sphericity[28 29].

Through EFA, we explored the factor structure using maximum likelihood (ML) extraction. Because we expected our factors to be interdependent aspects of Positive Health, we used ML extraction with direct oblimin rotation. Kaiser criterion, scree plot analysis, and parallel analysis were used to determine the numbers of factors to extract[30 31]. We considered items with cross loading values of  $\leq .32$  on at least two factors as weak (and thereby as candidates for deletion)[26]. And we considered items with factor loading of  $\geq .60$  as strong[32].

We strove for a model with improved psychometric properties and scale brevity, while maintaining enough items to create stable factors. We therefore aimed to reduce each factor to three items with highest factor loadings.

Through CFA, we evaluated the goodness of fit of the factor structure extracted during EFA. With the CFA evaluation we compared the extracted factor structure with two baseline models containing all 42 items of the MPH dialogue tool: the original 6-factor structure that includes the six dimensions of health and a 1-factor structure which considers all items belonging to one health domain. This comparison helps to understand the degree to which our extracted factor structure fits unseen data better than respectively the original 6-factor structure and the 1-factor structure. We evaluated the goodness of fit using several indices: Pearson’s Chi-squared test, comparative fit index (CFI;  $> .95$  is acceptable), Tucker Lewis index (TLI;  $> .95$  is acceptable), the root mean square error of approximation (RMSEA;  $< .06$  is acceptable), and standardized root mean square residual (SRMR;  $< .08$  is acceptable). These indices reflect model fit (Pearson’s Chi-squared test), incremental fit (CFI, TLI), and absolute fit (RMSEA, SRMR). The threshold values we applied are cut-off values recommended by Hu and Bentler (1999)[33] and endorsed by both Brown (2014)[25] and Cabrera-Nguyen (2010)[27]. For fitting the models, we used lavaan version 0.6-3[34] in R version 3.5.1[35].

We used maximum likelihood estimation and standardized the latent factors to allow free estimation of all factor loadings.

Finally, we examined the reliability and discriminant validity of the factors of both the original 6-factor model (MPH dialogue tool) and the new experimental model. We examined the reliability by evaluating the Cronbach's alpha coefficients and tested the discriminant validity by evaluating the factor correlations.

### *Ethical considerations*

Due to the harmless and non-invasive character of the study, this study was exempt from medical ethical approval. Prior to completion of the questionnaire, informed consent for the use of data for scientific purposes was asked in the invitation email to the participants. All data are handled anonymously.

## **Results**

### *Characteristics of respondents*

In total, 3218 participants were invited to enrol in the study. Of those, 708 participants completed the questionnaire (response rate is 22%). The mean age of the respondents was 62 years (SD = 15) and 46% of them were female. Most respondents had a high educational level 44% (medium 34%; low 22%). And 9% of the respondents indicated some to severe difficulty in getting around (poverty). Low health literacy (difficulty understanding health information such as leaflets) was indicated by 5% of the respondents. Comparing to the general 19+ population in the region Twente the respondents were older (Twente: mean age = 51); were higher educated (Twente: high educational level = 30%); had higher health literacy (Twente: 9%) and had less difficulty in getting around (Twente: 17%).

### *Exploratory Factor Analysis*

Our exploration showed that the data are suitable for EFA. Our sample had both an acceptable size of 356[32 33] and a very common participant-to-item ratio (8.5:1). The KMO test yielded a statistic of 0.97, implying that the dataset contains a significant number of factors, and the Bartlett's test of sphericity yielded significant results,  $\chi^2(41) = 318.368, p < .001$ , implying that the correlations among variables are greater than one would expect by chance.

Common approaches for determining the number of factors to extract showed support for a 6-factor structure. First, the Kaiser criterion method showed that the data contain 6 factors with eigenvalues greater than one, suggesting that the data clusters in 6 factors. . Second, the scree plot suggested 2, 4, or 6 factors because the eigenvalues level off after these amount of factors (see Figure 1). Third, parallel analysis (see Figure 2) suggested a structure of 6 factors – the crossing point of the actual scree plot with the possible scree plot based on randomly resampled data. A 6-factor structure accounts for 67.5% of the total item variance.

INSERT FIGURE 1 HERE.

INSERT FIGURE 2 HERE.



1  
2  
3 Factor loadings are shown in Table 1. In this table, factor names for the experimental model are  
4 displayed in the second horizontal row. Overall, the items that group together in our EFA mostly  
5 group together in the original model as well.  
6

7 Table 1 shows that the first factor has factor loadings above .40 for several items originating from the  
8 dimension Social and Societal Participation (SP). These items are: SP29 Social contacts, SP30 Being  
9 taken seriously, SP31 Doing fun things together, SP32 Having the support of others, SP33 Belonging.  
10 We selected the three highest factor loadings (SP29, SP32, and SP33) and labelled this factor 'Social  
11 relations'.  
12  
13

14 The second factor showed loadings above .40 on items from the original dimension Daily Functioning  
15 (DF). These items are: DF36 Looking after yourself, DF37 Knowing your limitations, DF38 Knowledge  
16 of health, DF39 Managing time, DF40 Managing money. We selected the three highest factor  
17 loadings (DF37, DF38, DF39) and labelled this factor 'Daily life-management'.  
18

19 The third factor showed that loadings above .40 were all strong factor loading ( $\geq .60$ ) on items from  
20 the original dimension Bodily Functions (BF). These items are: BF1 Feeling healthy, BF2 Feeling fit,  
21 BF5 Eating pattern, BF6 Physical condition, and BF7 Exercise. We included the three items with  
22 highest factor loadings (BF2, BF6, and BF7) and labelled this factor 'Physical fitness'.  
23  
24

25 The fourth factor showed loadings above .40 on items across three dimensions of the dialogue tool:  
26 Mental Well-being (MW), Meaningfulness (MF), and Quality of Life (QL). These items are: MW11  
27 Being cheerful, MW12 Accepting yourself, MW14 having control, MF16 Being high spirited, and  
28 MF19 Accepting life, QL22 Enjoyment, QL23 Being happy, QL24 Feeling good, and QL25 Feeling well-  
29 balanced. We selected the three highest factor loadings (QL23, QL24, and QL25) and labelled this  
30 factor 'Contentment'.  
31  
32

33 The fifth factor showed loadings above .40 on items from one dimension of the dialogue tool: Mental  
34 Wellbeing (MW) and Meaningfulness (MF). These items are: MW13 Being able to handle changes,  
35 MF17 Wanting to achieve ideals, MF18 Feeling confident about own future, MF21 Continue learning,  
36 and SP34 Doing meaningful things. We selected the three highest factor loadings (MW13, MF17, and  
37 MF18) and labelled this factor 'Future perspectives'.  
38

39 The last factor showed that loadings above .40 were all strong factor loading ( $\geq .60$ ) on items from  
40 one dimension of the dialogue tool: Mental Well-being (MW). These items are: MW8 Being able to  
41 remember things and MW9 Being able to concentrate. We selected these two highest factor loadings  
42 (MW8 and MW9) and labelled this factor 'Mental functioning', as these aspects solely focus on  
43 cognitive abilities and do not concern any emotional aspects or feelings.  
44  
45

46 In our exploration for a measurement instrument model, we were successful in reducing the number  
47 of items for five factors from 7 to 3 items and for one factor to 2 items. The final factor structure we  
48 extracted thus contained 17 items.  
49  
50  
51  
52  
53  
54  
55  
56  
57  
58  
59  
60

Table 1. Factor Pattern/Structure Rotated to the Oblimin Criterion

| Item number* | Description                               | Factor 1         | Factor 2         | Factor 3         | Factor 4    | Factor 5            | Factor 6           | $h^2$ |
|--------------|-------------------------------------------|------------------|------------------|------------------|-------------|---------------------|--------------------|-------|
|              |                                           | Social relations | Daily-management | Physical fitness | Contentment | Future achievements | Mental functioning |       |
| <b>BF1</b>   | <b>Feeling healthy</b>                    | -0.03            | 0.05             | <b>0.82</b>      | 0.12        | -0.02               | 0.03               | 0.81  |
| <b>BF2</b>   | <b>Feeling fit</b>                        | -0.04            | 0.03             | <b>0.86</b>      | 0.12        | -0.07               | 0.07               | 0.83  |
| BF3          | Having complaints or pain                 | 0.10             | -0.07            | 0.37             | -0.11       | 0.10                | 0.13               | 0.25  |
| BF4          | Sleeping pattern                          | 0.10             | -0.10            | 0.36             | 0.25        | 0.01                | 0.21               | 0.46  |
| BF5          | Eating pattern                            | 0.17             | -0.01            | 0.43             | 0.12        | 0.04                | 0.13               | 0.52  |
| BF6          | Physical condition                        | 0.09             | -0.02            | 0.73             | -0.08       | 0.12                | 0.02               | 0.68  |
| <b>BF7</b>   | <b>Exercise</b>                           | 0.02             | 0.09             | <b>0.74</b>      | -0.17       | 0.16                | -0.01              | 0.70  |
| <b>MW8</b>   | <b>Being able to remember things</b>      | -0.03            | -0.01            | 0.00             | -0.08       | 0.01                | <b>0.95</b>        | 0.82  |
| <b>MW9</b>   | <b>Being able to concentrate</b>          | 0.03             | 0.02             | 0.07             | 0.13        | -0.01               | <b>0.77</b>        | 0.82  |
| MW10         | Being able to communicate                 | 0.10             | 0.36             | 0.08             | -0.22       | 0.22                | 0.20               | 0.49  |
| MW11         | Being cheerful                            | 0.24             | 0.03             | 0.12             | 0.46        | 0.07                | 0.19               | 0.78  |
| MW12         | Accepting yourself                        | 0.21             | 0.14             | 0.13             | 0.46        | -0.01               | 0.10               | 0.69  |
| <b>MW13</b>  | <b>Being able to handle changes</b>       | 0.10             | 0.10             | 0.05             | -0.01       | <b>0.48</b>         | 0.11               | 0.51  |
| MW14         | Having control                            | 0.13             | 0.22             | 0.03             | 0.42        | 0.09                | 0.15               | 0.70  |
| MF15         | Having a meaningful life                  | 0.28             | 0.17             | 0.05             | 0.35        | 0.20                | 0.06               | 0.80  |
| MF16         | Being high-spirited                       | 0.13             | 0.13             | 0.20             | 0.41        | 0.17                | 0.08               | 0.78  |
| <b>MF17</b>  | <b>Wanting to achieve ideals</b>          | -0.06            | -0.05            | 0.06             | 0.01        | <b>0.87</b>         | 0.07               | 0.77  |
| <b>MF18</b>  | <b>Feeling confident about own future</b> | 0.12             | 0.03             | 0.01             | 0.19        | <b>0.68</b>         | 0.00               | 0.80  |
| MF19         | Accepting life                            | 0.06             | 0.18             | 0.08             | 0.41        | 0.21                | 0.00               | 0.57  |
| MF20         | Being grateful                            | 0.24             | 0.09             | 0.04             | 0.31        | 0.32                | 0.03               | 0.68  |
| MF21         | Continue learning                         | 0.06             | 0.13             | 0.15             | -0.08       | 0.43                | 0.05               | 0.43  |
| QL22         | Enjoyment                                 | 0.16             | 0.14             | 0.15             | 0.50        | 0.19                | 0.00               | 0.83  |
| <b>QL23</b>  | <b>Being happy</b>                        | 0.11             | 0.13             | 0.08             | <b>0.56</b> | 0.17                | 0.06               | 0.79  |
| <b>QL24</b>  | <b>Feeling good</b>                       | 0.09             | 0.07             | 0.16             | <b>0.58</b> | 0.14                | 0.12               | 0.86  |
| <b>QL25</b>  | <b>Feeling well-balanced</b>              | 0.08             | 0.12             | 0.16             | <b>0.56</b> | 0.13                | 0.11               | 0.85  |

|    |             |                                     |             |             |       |       |             |       |      |
|----|-------------|-------------------------------------|-------------|-------------|-------|-------|-------------|-------|------|
| 1  |             |                                     |             |             |       |       |             |       |      |
| 2  |             |                                     |             |             |       |       |             |       |      |
| 3  | QL26        | Feeling safe                        | 0.30        | 0.22        | 0.08  | 0.26  | 0.09        | 0.07  | 0.67 |
| 4  | QL27        | Living conditions                   | 0.37        | 0.13        | 0.02  | 0.26  | 0.09        | 0.04  | 0.57 |
| 5  | QL28        | Having enough money                 | 0.24        | 0.34        | 0.11  | -0.10 | 0.15        | 0.05  | 0.48 |
| 6  | <b>SP29</b> | <b>Social contacts</b>              | <b>0.88</b> | 0.02        | 0.00  | -0.08 | 0.04        | 0.05  | 0.82 |
| 7  | SP30        | Being taken seriously               | 0.66        | 0.17        | -0.10 | -0.03 | 0.15        | 0.05  | 0.72 |
| 8  | SP31        | Doing fun things together           | <i>0.81</i> | -0.02       | 0.08  | 0.07  | 0.03        | -0.05 | 0.77 |
| 9  | <b>SP32</b> | <b>Having the support of others</b> | <b>0.88</b> | 0.03        | -0.01 | 0.02  | -0.09       | 0.05  | 0.76 |
| 10 | <b>SP33</b> | <b>Belonging</b>                    | <b>0.88</b> | -0.04       | 0.03  | 0.08  | 0.01        | -0.02 | 0.84 |
| 11 | SP34        | Doing meaningful things             | 0.21        | 0.12        | 0.04  | 0.12  | <i>0.43</i> | 0.04  | 0.63 |
| 12 | SP35        | Being interested in society         | 0.11        | 0.40        | -0.03 | 0.11  | 0.20        | 0.10  | 0.55 |
| 13 | DF36        | Looking after yourself              | 0.13        | <i>0.68</i> | 0.13  | -0.09 | 0.02        | -0.06 | 0.63 |
| 14 | <b>DF37</b> | <b>Knowing your limitations</b>     | -0.06       | <b>0.88</b> | -0.02 | 0.13  | 0.00        | 0.02  | 0.81 |
| 15 | <b>DF38</b> | <b>Knowledge of health</b>          | 0.08        | <b>0.72</b> | 0.20  | -0.03 | -0.03       | -0.03 | 0.71 |
| 16 | <b>DF39</b> | <b>Managing time</b>                | 0.01        | <b>0.71</b> | -0.07 | 0.14  | -0.01       | 0.17  | 0.72 |
| 17 | DF40        | Managing money                      | 0.13        | <i>0.58</i> | 0.02  | -0.08 | 0.07        | 0.15  | 0.62 |
| 18 | DF41        | Being able to work                  | 0.04        | 0.33        | 0.18  | -0.05 | 0.29        | 0.02  | 0.49 |
| 19 | DF42        | Asking for help                     | 0.18        | 0.20        | 0.01  | -0.11 | 0.16        | 0.24  | 0.36 |
| 20 |             |                                     |             |             |       |       |             |       |      |
| 21 |             |                                     |             |             |       |       |             |       |      |
| 22 |             |                                     |             |             |       |       |             |       |      |
| 23 |             |                                     |             |             |       |       |             |       |      |
| 24 |             |                                     |             |             |       |       |             |       |      |
| 25 |             |                                     |             |             |       |       |             |       |      |
| 26 | % of        |                                     |             |             |       |       |             |       |      |
| 27 | variance    |                                     | 15.1        | 12.8        | 11.2  | 10.9  | 10.3        | 7.2   | 67.5 |

Notes: Coefficients greater than |.40| are italicized. The items in bold are retained for that factor.

\* BF refers to Bodily functions; MW refers to Mental well-being; MF refers to meaningfulness; QL refers to Quality of life; SP refers to Social and societal participation; DF refers to daily functioning

### *Confirmatory Factor Analysis*

The two baseline models, against which we compared the factor structure we extracted during our EFA, had low fits. First, the original 6-factor structure had a CFI of .846, TLI of .835, RMSEA of .086 with 90% confidence interval (CI) [.082, .089], and an SRMR of 0.063. Second, the 1-factor structure had a CFI of .731, TLI of .717, RMSEA of .112 with 90% confidence interval (CI) [.109, .115], and an SRMR of 0.066. The factor structure we extracted during the EFA, in contrast, had an acceptable fit, with a CFI of .964, TLI of .953, RMSEA of .071 with 90% confidence interval (CI) [.062, .081], and an SRMR of 0.036. This fit was significantly better than the fit of both the original 6-factor solution ( $\chi^2(700) = 2604.48, p < .001$ ) and the 1-factor solution ( $\chi^2(715) = 4174.19, p < .001$ ).

The items we selected during the EFA all showed positive factor loadings on their respective domains, with standardized coefficients ranging from .71 to .97 (see Table 2), supporting the factor structure. As we report in Table 3, the items within each factor yielded highly consistent response. More specifically, the Cronbach's alpha values of the factors ranged from .82 to .92. The six factors correlated significantly positively among each other (see Table 3), indicating that individuals that score higher on one domain typically score higher on the other domains. The factor correlations did not exceed .80, which suggest acceptable discriminant validity[25]. In comparison, the factor correlations of the original model suggest overlap between Meaningfulness and Mental well-being, Mental well-being and Quality of Life, Quality of life and Meaningfulness, Quality of Life and Social and societal participation, and Social and societal participation and Daily functioning (see Table 4). Cronbach alpha values from this original model range from .88 to .93.

Table 2. Parameter Estimates Confirmatory Factor Analysis

| Latent factor         | Item | Description                        | B    | SE   | Z     | Beta | p   |
|-----------------------|------|------------------------------------|------|------|-------|------|-----|
| Social relations      | 29   | Social contacts                    | 1.00 | 0.00 |       | 0.84 |     |
| Social relations      | 32   | Having the support of others       | 1.10 | 0.06 | 19.49 | 0.84 | *** |
| Social relations      | 33   | Belonging                          | 1.18 | 0.05 | 21.96 | 0.91 | *** |
| Daily life-management | 37   | Knowing your limitations           | 1.00 | 0.00 |       | 0.89 |     |
| Daily life-management | 38   | Knowledge of health                | 1.05 | 0.04 | 26.52 | 0.93 | *** |
| Daily life-management | 39   | Managing time                      | 1.09 | 0.06 | 19.90 | 0.80 | *** |
| Physical fitness      | 1    | Feeling healthy                    | 1.00 | 0.00 |       | 0.95 |     |
| Physical fitness      | 2    | Feeling fit                        | 1.05 | 0.04 | 24.89 | 0.88 | *** |
| Physical fitness      | 7    | Exercise                           | 1.03 | 0.06 | 17.97 | 0.74 | *** |
| Contentment           | 23   | Being happy                        | 1.00 | 0.00 |       | 0.87 |     |
| Contentment           | 24   | Feeling good                       | 1.10 | 0.04 | 25.95 | 0.94 | *** |
| Contentment           | 25   | Feeling well-balanced              | 1.01 | 0.05 | 22.28 | 0.87 | *** |
| Future perspective    | 13   | Being able to handle changes       | 1.00 | 0.00 |       | 0.71 |     |
| Future perspective    | 17   | Wanting to achieve ideals          | 1.19 | 0.09 | 12.92 | 0.73 | *** |
| Future perspective    | 18   | Feeling confident about own future | 1.32 | 0.09 | 14.90 | 0.86 | *** |
| Mental functioning    | 8    | Being able to remember things      | 1.00 | 0.00 |       | 0.83 |     |
| Mental functioning    | 9    | Being able to concentrate          | 1.15 | 0.06 | 19.53 | 0.97 | *** |

Notes: \*\*\* =  $p < .001$ , B = unstandardized estimates, Beta = standardized estimates.

Table 3. Means, SD, Cronbach's alpha (in correlation matrix diagonal) and correlations of the extracted factors (new model).

1  
2  
3  
4  
5  
6  
7  
8  
9  
10  
11  
12  
13  
14  
15  
16  
17  
18  
19  
20  
21  
22  
23  
24  
25  
26  
27  
28  
29  
30  
31  
32  
33  
34  
35  
36  
37  
38  
39  
40  
41  
42  
43  
44  
45  
46

| <b>Factor</b>             | <b>M</b> | <b>SD</b> | <b>(1)</b> | <b>(2)</b> | <b>(3)</b> | <b>(4)</b> | <b>(5)</b> | <b>(6)</b> |
|---------------------------|----------|-----------|------------|------------|------------|------------|------------|------------|
| (1) Physical fitness      | 7.60     | 1.70      | (.88)      |            |            |            |            |            |
| (2) Mental functions      | 7.76     | 1.58      | .58***     | (.89)      |            |            |            |            |
| (3) Future perspective    | 7.73     | 1.45      | .55***     | .57***     | (.82)      |            |            |            |
| (4) Contentment           | 7.92     | 1.59      | .64***     | .63***     | .73***     | (.92)      |            |            |
| (5) Social relations      | 8.42     | 1.35      | .54***     | .58***     | .64***     | .70***     | (.90)      |            |
| (6) Daily life-management | 8.52     | 1.35      | .57***     | .62***     | .67***     | .69***     | .72***     | (.90)      |

Notes: \*\*\* = p < .001.

For peer review only

Table 4. Means, SD, Cronbach's alpha (in correlation matrix diagonal) and correlations of the original factors (MPH dialogue tool).

| Factor                                | <i>M</i> | <i>SD</i> | (1)    | (2)    | (3)    | (4)    | (5)    | (6)   |
|---------------------------------------|----------|-----------|--------|--------|--------|--------|--------|-------|
| (1) Bodily functions                  | 7.60     | 1.70      | (.88)  |        |        |        |        |       |
| (2) Mental well-being                 | 7.76     | 1.58      | .72*** | (.90)  |        |        |        |       |
| (3) Meaningfulness                    | 7.73     | 1.45      | .65*** | .83*** | (.90)  |        |        |       |
| (4) Quality of life                   | 7.92     | 1.59      | .72*** | .83*** | .88*** | (.92)  |        |       |
| (5) Social and societal participation | 8.42     | 1.35      | .61*** | .77*** | .77*** | .81*** | (.93)  |       |
| (6) Daily functioning                 | 8.52     | 1.35      | .65*** | .79*** | .74*** | .78*** | .82*** | (.90) |

Notes: \*\*\* =  $p < .001$ .

## Discussion

The results of our factor analysis support a factor structure of six dimensions. The model we extracted contained 17 items, comprising the factors Physical fitness, Mental functions, Future perspectives, Contentment, Social relations, and Daily life-management. The extracted model showed improved construct validity compared to the original model with good fit, high reliability and acceptable discriminant validity. For the MPH tool our reliability tests suggest good to very good reliability (Cronbach alpha values ranging from .88 to .93). Furthermore, our factor analysis suggests overlap across the dimensions Mental wellbeing, Meaningfulness, Quality of life, and Social and societal participation, making the MPH tool less suitable as a measurement tool.

This study addresses the difference in aims and thereby required properties between a dialogue tool and a measurement tool. The results show that a 17-item model has better psychometric properties, and can thereby serve as a strong basis for the development of a Positive Health measure. However, the 17-item scale neglects several aspects relevant to address when determining and discussing an individual's perception of health. For example, for bodily functions, the ignored items about sleeping and eating patterns can inspire ideas and improve dialogue about improving bodily functions. Similarly, it ignores the aspect *accepting yourself*, whereas this was considered the most important aspect of Mental wellbeing by respondents (18-25 years) in a study that focused on the development of an adolescent version of the tool[36]. Importance of this aspect came forward in studies regarding the development of health-related quality of life and subjective well-being scales as well[6, 37]. Furthermore, research shows that poor living conditions and financial problems are often accompanied by considerable physical and mental problems[38-40]. Inclusion of these aspects in the MPH dialogue tool provides a broader understanding of the multiple needs of an individual. This enables individuals to express their needs during the dialogue about the results and enables to refer them, if required, to appropriate providers. Overall, for two statements within the MPH dialogue tool it can be argued that they also function as determinants - which influence people's perceived health - like patients themselves expressed during the original study, or consequences of health as well. While such determinants and consequences of health are not appropriately represented in the measurement of health itself, we suggest that they may still be relevant in a dialogue tool.

Difficulties to blend the two goals of both a dialogue tool and a measurement tool were noted earlier. During the development process, an attempt to transform the dimensions and underlying aspects into a questionnaire that could serve as a validated outcome measurement instrument to measure Positive Health has failed[21]. At this stage it appeared that the goal of a measurement tool to express outcome in health in (a) fixed number(-s) was too far from the experienced reality of an individual. Based on the results of our study and the previous attempt, we therefore suggest the use of two separate tools: (1) a dialogue tool with the aim to elucidate a broad representation of a person's perceived health status, comprising a broad range of aspects and (2) a measurement tool with improved psychometric properties that is able to capture broad health in a valid and reliable way. For this second purpose, our extracted 17-item model may serve as a basis.

When further developing a measurement tool to the measure (positive) health, several issues need to be addressed. First, concepts like salutogenesis, sense of coherence, and resilience form a strong basis of Positive Health, focussing on the abilities of individuals to handle changes and experience meaningfulness. It should be further investigated whether these concepts are sufficiently addressed in



1  
2  
3 the current 17-item experimental model. For example, the included aspects from the dimension of  
4 Meaningfulness solely focus on future achievements, while meaningfulness can be regarded as an  
5 integration of past, present and future[41]. Second, in line with the concept of health as the ability to  
6 adapt and to self-manage, one could expect that an individual with poor objective health status can still  
7 experience good health when being capable to deal well with the situation, while another individual with  
8 better objective health status can experience lower health. It would be a challenge to develop a  
9 measurement tool that does not reflect health by one continuum, but that can capture both realities.

### 12 *Methodological considerations*

14 This study was based on a survey among a citizen panel in eastern part of the Netherlands (Twente), with  
15 a mean age of 62 ( $SD = 15$ ) and 46% women. This relatively higher age of the study population compared  
16 to the whole adult population in this region (M age = 51) could reflect a higher interest in the topic of  
17 personal positive health status in older adults, and may be the result of the relatively low response rate  
18 of 22%. To be able to draw more firm conclusions about the psychometric properties of the MPH tool,  
19 this should be investigated among other populations as well. This will reveal to which extent difference  
20 in age, education level, health literacy and poverty level affects our findings.

23 In our study we have focused on the construct validity. Therefore, other psychometric properties such as  
24 the predictive validity, discriminant validity, and responsiveness of the 17- item model remain still  
25 unknown. Such issues should be addressed in future studies. Also, we made a first attempt to label the  
26 identified factors with factor names. The appropriateness of these names should be further investigated  
27 as well.

30 We based the choice to select three items per factor on both practical and theoretical arguments. From  
31 practical point of view, it is desirable to have a short and easy to use scale with acceptable psychometric  
32 properties. A scale of 17 items can be completed within a short amount of time. From a theoretical  
33 perspective, factors with fewer than three items are often weak and unstable[26]. Due to low factor  
34 loadings ( $< .40$ ) we were not able to select a third item for the factor Mental functions. To increase  
35 stability within this factor and to improve overall balance of the scale, we suggest to investigate the  
36 possibility to develop and include a third item for the factor Mental functions in future studies.

### 39 *Conclusion*

41 Overall, we conclude that the overall structure of the MPH dialogue tool, seems reliable. While the 42-  
42 item model might be suitable as a dialogue tool, this study shows that it is not suitable as a  
43 measurement tool. Instead, we propose a 17-item model with a six factor structure, comprising the  
44 factors Physical fitness, Mental functions, Future perspective, Contentment, Social relations, and Daily  
45 life-management, which can serve as a basis for the development of an additional measurement tool.  
46 Given the prevailing healthcare trend towards a focus on health and wellbeing, expressed by an  
47 increased number of practices based on a Positive Health approach, the existence of such measurement  
48 tool is of great importance.

### 53 **Author contributions**

SB collected the data. BD performed the statistical analysis. MV interpreted the results and wrote the manuscript in collaboration with BD and EA. All authors commented and agreed on the final version.

### Funding Statement

This research received no specific grant from any funding agency in the public, commercial or non-profit sector.

### Competing interest

The authors declare no conflict of interest.

### Data sharing statement

A request for sharing data can be made by sending an email to the corresponding author.

### Patient and Public involvement statement

Patients and/ or the public were not involved in the design, or conduct, or reporting, or dissemination plans of our research.

### Acknowledgement

We thank all respondents from the GGD Twente citizens' panel for completing our questionnaire.

### References

1. Johansen F, Loorbach D, Stoopendaal A. Exploring a transition in Dutch healthcare. *J Health Organ Manag* 2018;32(7):875-90 doi: 10.1108/JHOM-07-2018-0185.
2. Palmer K, Marengoni A, Forjaz MJ, et al. Multimorbidity care model: Recommendations from the consensus meeting of the Joint Action on Chronic Diseases and Promoting Healthy Ageing across the Life Cycle (JA-CHRODIS). *Health Policy* 2018;122(1):4-11 doi: 10.1016/j.healthpol.2017.09.006.
3. Hoeymans N, Van Loon AJM, Van den Berg M, et al. A healthier Netherlands: the key findings of the sixth Public Health Status and Foresight Bilthoven, The Netherlands: National Institute for Public Health and the environment (RIVM), 2014.
4. Barnett K, Mercer SW, Norbury M, Watt G, Wyke S, Guthrie B. Epidemiology of multimorbidity and implications for health care, research, and medical education: A cross-sectional study. *Lancet* 2012;380(9836):37-43 doi: 10.1016/S0140-6736(12)60240-2.
5. Butalid L, Verhaak PF, Boeije HR, Bensing JM. Patients' views on changes in doctor-patient communication between 1982 and 2001: a mixed-methods study. *BMC Fam Pract* 2012;13:80 doi: 10.1186/1471-2296-13-80.
6. De Vries M, Emons WHM, Plantinga A, et al. Comprehensively Measuring Health-Related Subjective Well-Being: Dimensionality Analysis for Improved Outcome Assessment in Health Economics. *Value Health* 2016;19(2):167-75 doi: 10.1016/j.jval.2015.11.010.
7. Al-Janabi H, Flynn TN, Coast J. Development of a self-report measure of capability wellbeing for adults: the ICECAP-A. *Qual Life Res* 2012;21(1):167-76 doi: 10.1007/s11136-011-9927-2.
8. NWA. Portfolio for research and innovation - Health care research, sickness prevention and treatment. The Hague, 2016.
9. Smid HJ, Wydoodt A. ZonMW signalement over zingeving in zorg: de mens centraal [ZonMW description about meaningfulness in care: focus on the individual]. 2nd edition ed. Den Haag: ZonMw, 2017.

10. Vanderweele TJ. On the promotion of human flourishing. *Proc Natl Acad Sci U S A*, 2017;8148-56 doi: 10.1073/pnas.1702996114.
11. Stucki G, Bickenbach J. Health, Functioning, and Well-being: Individual and Societal. *Arch Phys Med Rehabil* 2019;100(9):1788-92 doi: 10.1016/j.apmr.2019.03.004.
12. Huber M, Knottnerus A, Green L, et al. How should we define health? *BMJ* 2011;343(7817):1-3 doi: 10.1136/bmj.d4163.
13. Editorial. What is health? The ability to adapt. *Lancet* 2009;373(9666):781-81 doi: 10.1016/S0140-6736(09)60456-6.
14. Jadad AR, O'Grady L. How should health be defined? *BMJ* 2008;337:a2900 doi: 10.1136/bmj.a2900.
15. Larson JS. The conceptualization of health. *Med Care Res Rev* 1999;56:123-36 doi: 10.1177/107755879905600201.
16. Smith R. The end of disease and the beginning of health - *BMJ*, 2008.
17. Van der Lucht F, Polder JJ. Towards better health - The Dutch 2010 Public Health Status and Forecasts Report. Bilthoven: RIVM, 2010.
18. Bircher J. Towards a dynamic definition of health and disease. *Med Health Care Philos* 2005;8(3):335-41 doi: 10.1007/s11019-005-0538-y.
19. Kooiker SE. Nederlanders aan het woord over gezondheid en gezond leven. Achtergrond bij VTV 2010 Van Gezond naar Beter [Stories from Dutch citizens about health and healthy living. Background to the Dutch 2010 Public Health Status and Forecasts Report]. Bilthoven: RIVM, 2011.
20. Huber M, van Vliet M, Giezenberg M, et al. Towards a 'patient-centred' operationalisation of the new dynamic concept of health: a mixed methods study. *BMJ open* 2016;6(1):e010091 doi: 10.1136/bmjopen-2015-010091.
21. Prinsen CAC, Terwee CB. Measuring positive health: for now, a bridge too far. *Public Health* 2019;170:70-77 doi: 10.1016/j.puhe.2019.02.024.
22. Al Shamma S, Van den Dries L, Van Wezep M, Wolf J. Ervaringen met de gesprekstool 'Mijn Positieve Gezondheid' [Experiences with the dialogue tool 'My Positive Health']. Nijmegen, 2018:1-40.
23. Hendriks RJP, Spreeuwenberg MD, Drewes HW, Ruwaard D, Baan CA. How to Measure Population Health: An Exploration Toward an Integration of Valid and Reliable Instruments This study was presented as a poster presentation at the International Conference on Integrated Care 2017, held May 8–10, 2017 in Dublin, Ireland. *Popul Health Manag* 2018;21(4):323-30 doi: 10.1089/pop.2017.0097.
24. Linton M, Dieppe P, Medina-Lara A. Review of 99 self-report measures for assessing well-being in adults: exploring dimensions of well-being and developments over time. *BMJ open* 2016;6(7):e010641-e41 doi: 10.1136/bmjopen-2015-010641.
25. Brown TA. Confirmatory factor analysis for applied research. New York, NY: The Guilford Press, 2014.
26. Costello AB, Osborne JW. Best practices in exploratory factor analysis: Four recommendations for getting the most from your analysis. *Pract Assess Res Eval* 2005;10:1-9 doi: 10.1.1.110.9154.
27. Cabrera-Nguyen P. Author Guidelines for Reporting Scale Development and Validation Results in the Journal of the Society for Social Work and Research. *J Soc Social Work Res* 2010;1(2):99-103 doi: 10.5243/jsswr.2010.8.
28. Comrey AL, Lee HB. A First Course in Factor Analysis. Hillsdale, NJ: Lawrence Erlbaum, 1992.
29. Worthington RL, Whittaker TA. Scale development research: A content analysis and recommendations for best practices. *Couns Psychol* 2006;34(6):806-38
30. Kaiser HF. The Application of Electronic Computers to Factor Analysis. *Educ Psychol Meas* 1960;20(1):141-51 doi: 10.1177/001316446002000116.
31. Kaiser HF, Rice J. Little Jiffy, Mark Iv. *Educ Psychol Meas* 1974;34(1):111-17 doi: 10.1177/001316447403400115.
32. Garson GD. Factor Analysis. Asheboro, NC: Statistical Associates Publishers, 2013.

- 1  
2  
3 33. Hu L, Bentler PM. Cutoff criteria for fit indexes in covariance structure analysis: Conventional criteria  
4 versus new alternatives. *Struct Equ Modeling* 1999;6(1):1-55 doi: 10.1080/10705519909540118.  
5  
6 34. Rosseel Y. Lavaan: An R package for structural equation modeling. *J Stat Softw* 2012;48(2):1-36  
7  
8 35. Team RC. R: A Language and Environment for Statistical Computing. Vienna: R Foundation for  
9 Statistical Computing, 2018.  
10 36. Van Vliet M, Van der Zanden S, Huber M. Ontwikkeling van de 'Mijn Positieve Gezondheid'  
11 jongerentool [Development of the My Positive Health adolescent tool]. Utrecht: Institute for  
12 Positive Health, 2019.  
13 37. Pietersma S, de Vries M, van den Akker-van Marle ME. Domains of quality of life: results of a three-  
14 stage Delphi consensus procedure among patients, family of patients, clinicians, scientists and  
15 the general public. *Qual Life Res* 2014;23(5):1543-56 doi: 10.1007/s11136-013-0578-3.  
16 38. Bodden DHM, Deković M. Multiproblem Families Referred to Youth Mental Health: What's in a  
17 Name? *Fam Process* 2016;55(1):31-47 doi: 10.1111/famp.12144.  
18 39. Moorhead R, Robinson M. A trouble shared – legal problems clusters in solicitors' and advice  
19 agencies. London: Department for Constitutional Affairs, 2006.  
20 40. Smith M, Buck A, Sidaway J, Scanlan L. Bridging the Empirical Gap: New Insights into the Experience  
21 of Multiple Legal Problems and Advice Seeking. *J Empir Leg Stud* 2013;10(1):146-70 doi:  
22 10.1111/jels.12006.  
23 41. Baumeister RF, Vohs KD, Aaker JL, Garbinsky EN. Some key differences between a happy life and a  
24 meaningful life. *J Posit Psychol* 2013;8(6):505-16 doi: 10.1080/17439760.2013.830764.  
25  
26  
27  
28  
29  
30  
31  
32  
33  
34  
35  
36  
37  
38  
39  
40  
41  
42  
43  
44  
45  
46  
47  
48  
49  
50  
51  
52  
53  
54  
55  
56  
57  
58  
59  
60

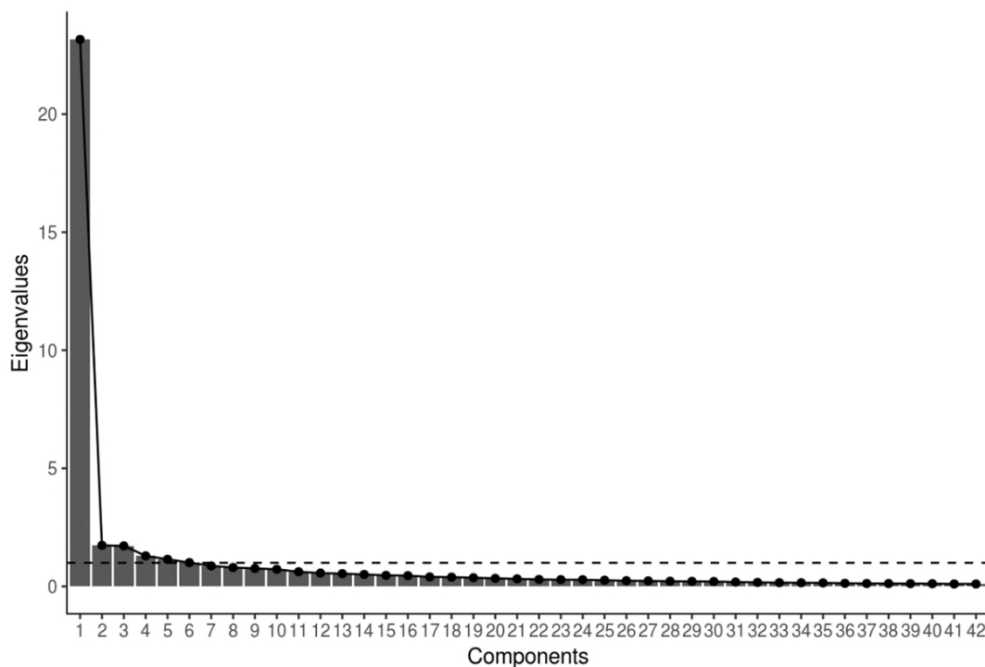

Figure 1. Scree plot. Note: Kaiser criterion is shown by the black dashed line.

141x95mm (220 x 220 DPI)

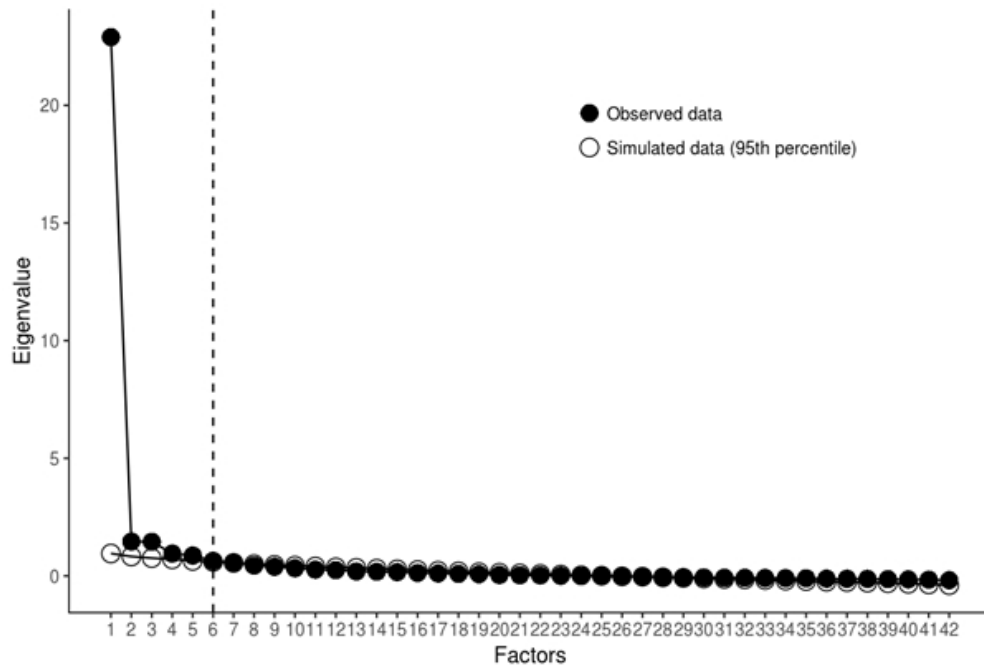

Figure 2. Parallel Analysis. Note: The 6-factor structure is shown by the black dashed line.

160x108mm (96 x 96 DPI)

**MY POSITIVE HEALTH**

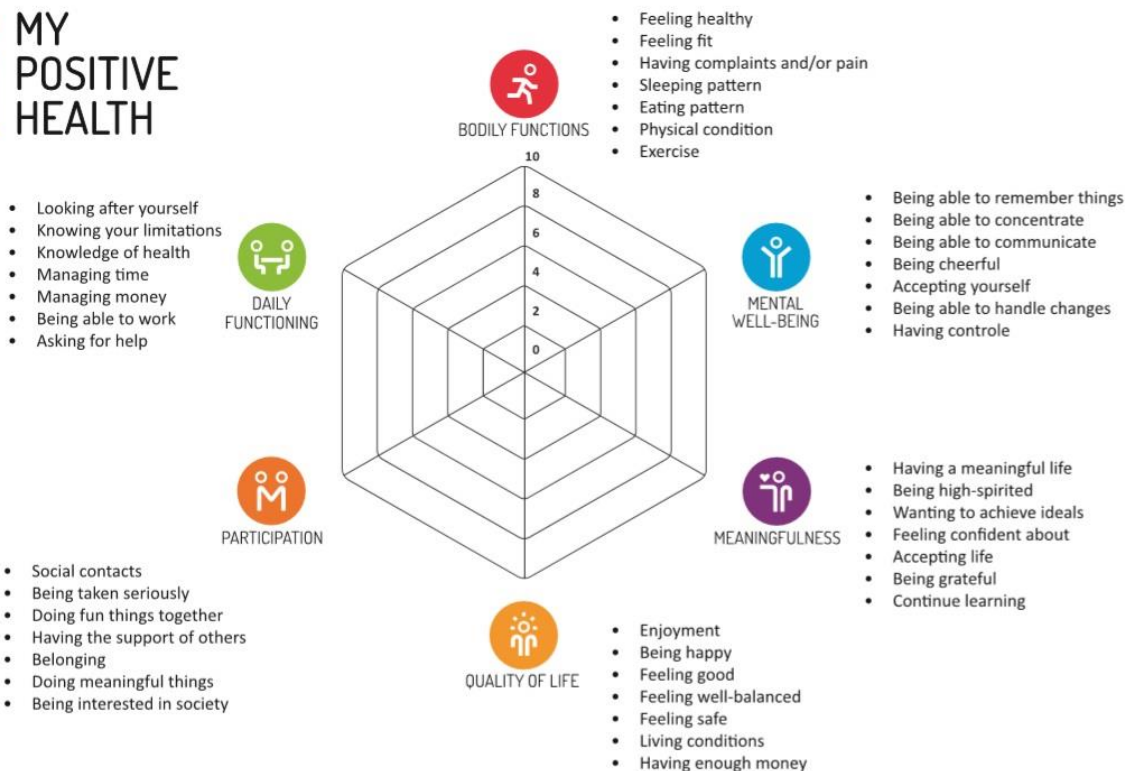

Institute for Positive Health (IPH) | Dialogue tool 1.0

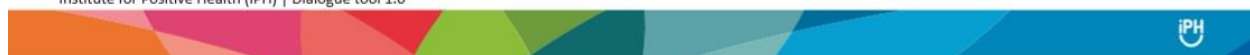

Supplementary file 1. My Positive Health spiderweb comprising 6 dimensions and 42 aspects

# BMJ Open

## Development and psychometric evaluation of a Positive Health measurement scale: a factor analysis study based on a Dutch population.

|                                 |                                                                                                                                                                                                                                                                         |
|---------------------------------|-------------------------------------------------------------------------------------------------------------------------------------------------------------------------------------------------------------------------------------------------------------------------|
| Journal:                        | <i>BMJ Open</i>                                                                                                                                                                                                                                                         |
| Manuscript ID                   | bmjopen-2020-040816.R2                                                                                                                                                                                                                                                  |
| Article Type:                   | Original research                                                                                                                                                                                                                                                       |
| Date Submitted by the Author:   | 14-Dec-2020                                                                                                                                                                                                                                                             |
| Complete List of Authors:       | Van Vliet, Marja; Institute for Positive Health, Doornenbal, Brian; Salut ; Vrije Universiteit Amsterdam, School of business and economics<br>Boerema, Simone; GGD Twente<br>van den Akker-van Marle, Elske; Leiden University Medical Center, Biomedical Data Sciences |
| <b>Primary Subject Heading</b>: | Public health                                                                                                                                                                                                                                                           |
| Secondary Subject Heading:      | Research methods, Health services research, Patient-centred medicine, Health informatics                                                                                                                                                                                |
| Keywords:                       | Quality in health care < HEALTH SERVICES ADMINISTRATION & MANAGEMENT, Health economics < HEALTH SERVICES ADMINISTRATION & MANAGEMENT, PREVENTIVE MEDICINE, PRIMARY CARE, PUBLIC HEALTH, STATISTICS & RESEARCH METHODS                                                   |
|                                 |                                                                                                                                                                                                                                                                         |

SCHOLARONE™  
Manuscripts





I, the Submitting Author has the right to grant and does grant on behalf of all authors of the Work (as defined in the below author licence), an exclusive licence and/or a non-exclusive licence for contributions from authors who are: i) UK Crown employees; ii) where BMJ has agreed a CC-BY licence shall apply, and/or iii) in accordance with the terms applicable for US Federal Government officers or employees acting as part of their official duties; on a worldwide, perpetual, irrevocable, royalty-free basis to BMJ Publishing Group Ltd ("BMJ") its licensees and where the relevant Journal is co-owned by BMJ to the co-owners of the Journal, to publish the Work in this journal and any other BMJ products and to exploit all rights, as set out in our [licence](#).

The Submitting Author accepts and understands that any supply made under these terms is made by BMJ to the Submitting Author unless you are acting as an employee on behalf of your employer or a postgraduate student of an affiliated institution which is paying any applicable article publishing charge ("APC") for Open Access articles. Where the Submitting Author wishes to make the Work available on an Open Access basis (and intends to pay the relevant APC), the terms of reuse of such Open Access shall be governed by a Creative Commons licence – details of these licences and which [Creative Commons](#) licence will apply to this Work are set out in our licence referred to above.

Other than as permitted in any relevant BMJ Author's Self Archiving Policies, I confirm this Work has not been accepted for publication elsewhere, is not being considered for publication elsewhere and does not duplicate material already published. I confirm all authors consent to publication of this Work and authorise the granting of this licence.

1  
2  
3 1 **Development and psychometric evaluation of a Positive Health measurement**  
4 **scale: a factor analysis study based on a Dutch population**  
5  
6  
7 3

8  
9 4 Marja van Vliet<sup>1</sup>, Brian Doornenbal<sup>2,3</sup>, Simone Boerema<sup>4</sup>, M. Elske van den  
10 Akker-van Marle<sup>5</sup>  
11

12 6 1 Institute for Positive Health, Utrecht, the Netherlands  
13

14 7 2 Salut, Arnhem, the Netherlands  
15

16 8 3 Department of Management and Organisation, School of Business and  
17 Economics, Vrije Universiteit Amsterdam, Amsterdam, the Netherlands  
18 9

19 10 4 Municipal health service Twente (GGD Twente), Enschede, the Netherlands  
20 11

21 11 5 Department of Biomedical Data Sciences, section Medical Decision Making,  
22 Leiden University Medical Center (LUMC), Leiden, the Netherlands  
23 12

24 13  
25  
26  
27  
28  
29  
30  
31  
32  
33  
34  
35  
36  
37  
38  
39  
40  
41  
42  
43  
44  
45  
46  
47  
48  
49  
50  
51  
52  
53  
54  
55  
56  
57  
58  
59  
60

14

15

16

17

18

19

20 Corresponding author:

21 Marja van Vliet, PhD

22 m.vanvliet@iph.nl  
23  
24

25 Keywords: Positive Health, population health, validation, patient-reported outcome  
26 measure, factor analysis, health survey

27 **Word count:** 4108 words  
28

# 1 Development and psychometric evaluation of a Positive Health measurement 2 scale: a factor analysis study based on a Dutch population

## 3 4 **Abstract**

5 OBJECTIVES: The My Positive Health (MPH) dialogue tool is increasingly adopted by healthcare  
6 professionals in the Netherlands as well as abroad to support people in their health. Given this trend,  
7 the need arises to measure effects of interventions on the Positive Health dimensions. However, the  
8 dialogue tool was not developed for this purpose. Therefore, this study aims to work towards a  
9 suitable measurement scale using the My Positive Health (MPH) dialogue tool as starting point.

10 DESIGN: A cross-sectional study design

11 PARTICIPANTS AND SETTINGS: A total of 708 respondents, who were all members of the municipal  
12 health service panel in the eastern part of the Netherlands, completed the MPH dialogue tool.

13 METHODS: The factor structure of the MPH dialogue tool was explored through exploratory factor  
14 analysis (EFA) using maximum likelihood extraction. Next, the fit of the extracted factor structure was  
15 tested through confirmatory factor analysis (CFA). Reliability and discriminant validity of both a new  
16 model and the MPH scales were assessed through Cronbach's alpha tests.

17 RESULTS: Similar to the MPH dialogue tool, the extracted 17-item model has a six factor structure but  
18 named differently, comprising the factors Physical fitness, Mental functions, Future perspectives,  
19 Contentment, Social relations, and Health management. The reliability tests suggest good to very  
20 good reliability of the aimed measurement tool and MPH model (Cronbach's alpha values ranging  
21 from respectively .820 to .920 and .882 to .933). The measurement model shows acceptable  
22 discriminant validity, whereas the MPH model suggests overlap between domains.

23 CONCLUSION: The results suggest that the current MPH dialogue tool seems reliable as a dialogue,  
24 but is not suitable as a measurement scale. We therefore propose a 17-item model with improved,  
25 acceptable psychometric properties which can serve as a basis for further development of a  
26 measurement scale.

## 27 28 **Strengths and limitations of this study**

29 \* Main strength of this study was the thorough psychometric analysis to develop a Positive Health  
30 measurement scale.

31 \* Data from a large group of respondents (N= 708) with suitable characteristics for factor analysis  
32 were used.

33 \* Development of the Positive Health measurement tool was based on the items of the Positive  
34 Health dialogue tool, which is widely used in the Netherlands.

35 \* This study had a relatively low response rate (22%), which may have created a sampling bias.

36 \* Given the relatively small geographic area in which the data are collected, wider generalisation of  
37 the present results may be restricted.

38

## 1 Introduction

Over the last years, the European healthcare system is increasingly shifting its focus from cure and disease towards health and healthy behaviour[1, 2]. In the Netherlands, more attention is given to health-oriented approaches, which focus on health promotion, vitality and possibilities rather than on imperfections[3]. This process was accelerated by the demographic situation of an increasing number of elderly people with one or more chronic disease, increasing healthcare expenditures and an increasing wish of citizens for an active and autonomic role during medical consultation[1, 4, 5]. Within the shift towards health-oriented approaches, a focus on health which is broader than only biomedical aspects, and which contributes to achieving a more meaningful life, has gained more interest[6-10]. Furthermore, it is increasingly recognized that understanding patients' experiences about living with a disease, is of vital importance in the management of chronic diseases[11].

Taking this broader focus into mind, Huber et al. (2011)[12] proposed a new concept of health, which describes health "as the ability to adapt and self-manage, in the face of physical, mental and social challenges". According to this concept, being healthy reflects the capacity to deal with internal and external stressors, despite possible limitations – and the tendency to adapt to changing conditions. This opposes to the more static current definition of the WHO, which regards health "as a complete physical, mental and social wellbeing and not merely the absence of disease or infirmity". Although this definition was not intended as such, critics express that the very high ambition has resulted in a major focus on the diagnosis and treatment of symptoms and disease[13-16]. However, people with chronic diseases do not automatically see themselves as being unhealthy[17]. Similarly, many elderly people consider themselves to be healthy, even if their physical abilities are significantly reduced. To them, being healthy often means to have the ability to fulfil one's life[10, 18, 19]. This is fully in line with the content of the new concept of 2011.

The Dutch government considered the dynamic concept of health by Huber et al. (2011)[12] to serve well as a framework for the new strategy within the Dutch healthcare system and required an operationalisation study to make the concept useful for practice[20]. During this study the concept has been further elaborated into the concept of Positive Health, nowadays written with capitals as to express the specific content. The content of the concept is derived from interviews and focus groups with different stakeholder groups (e.g. patients, healthy citizens, healthcare professionals, etc.) This inductive, bottom-up approach enabled the researchers to gain a thorough insight into the perceptions about the health of patients and other stakeholders themselves. Positive Health represents a broad perception of health, expressed by six dimensions with 32 underlying aspects, representing indicators for health. The dimensions were by then named: bodily functions, mental functions and perception, spiritual existential dimension, quality of life, social and societal participation and daily functioning. The six dimensions were visualized in a spider web with six axes, representing these six dimensions and ranging from value 0 (in the centre for poor) to 10 (on the periphery, for excellent). Soon people in practice started to use the spiderweb in dialogue with patients.

Also soon after the spiderweb became available an attempt started to transform the dimensions and 32 aspects into a questionnaire that could serve as a validated outcome measurement instrument to measure Positive Health. However, this attempt failed[21]. The results of the validity study suggested that the tool was not suitable as a measurement instrument[21]. It appeared that the goal of a measurement tool to express outcomes in health in a fixed number was too far from the experienced reality of an individual. Moreover, the 32 items appeared to be rather long for measurement purposes but also interviews made clear that the language of the present spiderweb was too complex for many people. Because of this feedback the six dimensions and the underlying 32 aspects

1  
2  
3 1 of Positive Health were elaborated by an expert panel group into a more simple language and into  
4 2 42 aspects, including now (as exceptions) the determinants living conditions and having enough  
5 3 money. The dimensions were renamed as bodily functions, mental well-being, meaningfulness,  
6 4 quality of life, participation and daily functioning. The result was called: the My Positive Health  
7 5 (MPH) dialogue tool (see [www.MijnPositieveGezondheid.nl](http://www.MijnPositieveGezondheid.nl)).

8  
9  
10 6 This MPH tool aims to provide individuals insight in their own health and stimulate self-reflection.  
11 7 Target population are Dutch citizens, with or without a chronic disease. By completing 42  
12 8 statements, mean scores for each of the dimensions are graphically displayed in a spider web. See  
13 9 Supplementary file 1. This spider web can be used during consultations with (for example) healthcare  
14 10 professionals, to discuss one's perceived health and to reveal one's needs, desires and abilities.  
15 11 Thereby it could lead to identifiable statements which would find connection with the people  
16 12 concerned. This recognition was confirmed by a user evaluation among populations of healthy  
17 13 citizens, elderly, and chronically ill. The vast majority of the respondents rated the MPH dialogue tool  
18 14 good to excellent[22]. The tool is widely used in the Netherlands, with more than 100.000 unique  
19 15 users for the digital version since its introduction in 2016 (see [MijnPositieveGezondheid.nl](http://MijnPositieveGezondheid.nl)  
20 16 ("MyPositiveHealth.nl")). In addition, a paper version of the MPH tool is used across a wide range of  
21 17 care centres.

22  
23  
24  
25 18 INSERT SUPPLEMENTARY FILE 1 HERE.

26  
27 19 Along with the extensive use of the dialogue tool, a growing interest is once again observed for a  
28 20 measurement instrument that measure changes in a person's Positive Health. Such a measurement  
29 21 tool could provide stakeholders in various domains and levels (e.g. healthcare professionals, national  
30 22 and local policy makers and insurers) with valid information on the effectiveness of a Positive Health  
31 23 approach. Such insight could support them during the decision-making process and thereby enable a  
32 24 more structural implementation of interventions that improve people's (positive) health. As far as we  
33 25 were aware, no other validated questionnaire is available that covers the broad concept of Positive  
34 26 Health and since Prinsen no new attempt was made to develop such measurement instrument [23,  
35 27 24]. The objective of this present study was to set first steps in a new attempt towards a suitable  
36 28 measurement instrument with adequate psychometric properties and scale brevity. This instrument  
37 29 could meet the needs of professionals wishing to evaluate their Positive Health interventions. In  
38 30 order to reach this objective, we aimed to extract an improved model to measure (positive) health by  
39 31 performing an Exploratory Factor Analysis (EFA) and to test it through confirmatory factor analysis  
40 32 (CFA). Performing a factor analysis will not only help to identify items to measure (positive) health, it  
41 33 will also provide insight into the adequacy of the current arrangement of dimensions and aspects of  
42 34 the MPH dialogue tool. Furthermore, we also aimed to examine the reliability of the MPH dialogue  
43 35 tool.

## 44 45 46 47 48 49 50 37 **Methods**

### 51 52 38 *Design*

53  
54 39 This study comprised a cross-sectional quantitative survey study. Data from the quantitative survey  
55 40 was used to develop a new model to measure health by performing an Exploratory Factor Analysis  
56 41 (EFA) following a confirmatory factor analysis (CFA).

## 1 *The instrument*

2 We use the digital version of the MPH dialogue tool (MijnPositieveGezondheid.nl;  
3 “MyPositiveHealth.nl”) in this study. In this digital version, 42 statement are proposed (7 for each  
4 dimension) on an 11-point scale. 0 means totally disagree and 10 means totally agree. To avoid any  
5 missing data, it is not allowed to skip any question.

## 6 *Participants and data collection*

7 Members of the citizens’ panel of GGD Twente (regional municipal health service) were asked to fill  
8 out the 42 questions of the MPH dialogue tool and were asked for their age, gender, educational  
9 level, poverty (difficulty getting around), and health literacy (difficulty understanding health  
10 information such as leaflets). This panel comprises adults (19+) who took part in the national health  
11 survey of GGD Twente in the east of the Netherlands. This survey is carried out every four years to  
12 monitor the general state of health of Dutch citizens. At the end of that health survey, the  
13 participants were asked whether they were willing to participate in other, future studies by GGD  
14 Twente. Participants were invited by email to complete the questionnaire. Data collection took place  
15 from January to February 2018.

## 16 *Analytical plan*

17 To examine the construct validity of the MPH tool, we used a split-half validation method in which  
18 we randomly divided the participants into two groups. We used one of these groups to explore the  
19 factor structure through exploratory factor analysis (EFA) and the other group to test the goodness of  
20 fit of the extracted factor structure through confirmatory factor analysis (CFA). In conducting the  
21 factor analyses, we followed best practices described by Brown[25], Costello and Osborne[26], and  
22 Cabrera-Nguyen[27]. Suitability of the data for EFA was examined based on the Kaiser–Meyer–Olkin  
23 (KMO) statistic of sampling adequacy and the Bartlett’s test of sphericity[28 29].

24 Through EFA, we explored the factor structure using maximum likelihood (ML) extraction. Because  
25 we expected our factors to be interdependent aspects of Positive Health, we used ML extraction with  
26 direct oblimin rotation. Kaiser criterion, scree plot analysis, and parallel analysis were used to  
27 determine the numbers of factors to extract[30 31]. We considered items with cross loading values  
28 of  $\leq .32$  on at least two factors as weak (and thereby as candidates for deletion)[26]. And we  
29 considered items with factor loading of  $\geq .60$  as strong[32].

30 We strove for a model with improved psychometric properties and scale brevity, while maintaining  
31 enough items to create stable factors. We therefore aimed to reduce each factor to three items with  
32 highest factor loadings.

33 Through CFA, we evaluated the goodness of fit of the factor structure extracted during EFA. With the  
34 CFA evaluation we compared the extracted factor structure with two baseline models containing all  
35 42 items of the MPH dialogue tool: the original 6-factor structure that includes the six dimensions of  
36 health and a 1-factor structure which considers all items belonging to one health domain. This  
37 comparison helps to understand the degree to which our extracted factor structure fits unseen data  
38 better than respectively the original 6-factor structure and the 1-factor structure. We evaluated the  
39 goodness of fit using several indices: Pearson’s Chi-squared test, comparative fit index (CFI;  $> .95$  is  
40 acceptable), Tucker Lewis index (TLI;  $> .95$  is acceptable), the root mean square error of  
41 approximation (RMSEA;  $< .06$  is acceptable), and standardized root mean square residual (SRMR;  $<$   
42  $.08$  is acceptable). These indices reflect model fit (Pearson’s Chi-squared test), incremental fit (CFI,  
43 TLI), and absolute fit (RMSEA, SRMR). The threshold values we applied are cut-off values

recommended by Hu and Bentler (1999)[33] and endorsed by both Brown (2014)[25] and Cabrera-Nguyen (2010)[27]. For fitting the models, we used lavaan version 0.6-3[34] in R version 3.5.1[35]. We used maximum likelihood estimation and standardized the latent factors to allow free estimation of all factor loadings.

Finally, we examined the reliability and discriminant validity of the factors of both the original 6-factor model (MPH dialogue tool) and the new experimental model. We examined the reliability by evaluating the Cronbach's alpha coefficients and tested the discriminant validity by evaluating the factor correlations.

#### *Ethical considerations*

Due to the harmless and non-invasive character of the study, this study was exempt from medical ethical approval. Prior to completion of the questionnaire, informed consent for the use of data for scientific purposes was asked in the invitation email to the participants. All data are handled anonymously.

#### *Patient and Public involvement statement*

Patients and/ or the public were not involved in the design, or conduct, or reporting, or dissemination plans of our research.

## **Results**

### *Characteristics of respondents*

In total, 3218 participants were invited to enrol in the study. Of those, 708 participants completed the questionnaire (response rate is 22%). The mean age of the respondents was 62 years (SD = 15) and 46% of them were female. Most respondents had a high educational level 44% (medium 34%; low 22%). And 9% of the respondents indicated some to severe difficulty in getting around (poverty). Low health literacy (difficulty understanding health information such as leaflets) was indicated by 5% of the respondents. Comparing to the general 19+ population in the region Twente the respondents were older (Twente: mean age = 51); were higher educated (Twente: high educational level = 30%); had higher health literacy (Twente: 9%) and had less difficulty in getting around (Twente: 17%).

### *Exploratory Factor Analysis*

Our exploration showed that the data are suitable for EFA. Our sample had both an acceptable size of 356[32 33] and a very common participant-to-item ratio (8.5:1). The KMO test yielded a statistic of 0.97, implying that the dataset contains a significant number of factors, and the Bartlett's test of sphericity yielded significant results,  $\chi^2(41) = 318.368, p < .001$ , implying that the correlations among variables are greater than one would expect by chance.

Common approaches for determining the number of factors to extract showed support for a 6-factor structure. First, the Kaiser criterion method showed that the data contain 6 factors with eigenvalues greater than one, suggesting that the data clusters in 6 factors. Second, the scree plot suggested 2, 4, or 6 factors because the eigenvalues level off after these amount of factors (see Figure 1). Third, parallel analysis (see Figure 2) suggested a structure of 6 factors – the crossing point of the actual scree plot with the possible scree plot based on randomly resampled data. A 6-factor structure accounts for 67.5% of the total item variance.

1  
2  
3 1 INSERT FIGURE 1 HERE.

4  
5 2 INSERT FIGURE 2 HERE.

6  
7 3

8  
9 4 Factor loadings are shown in Table 1. In this table, factor names for the experimental model are  
10 5 displayed in the second horizontal row. Overall, the items that group together in our EFA mostly  
11 6 group together in the original model as well.

12  
13 7 Table 1 shows that the first factor has factor loadings above .40 for several items originating from the  
14 8 dimension Social and Societal Participation (SP). These items are: SP29 Social contacts, SP30 Being  
15 9 taken seriously, SP31 Doing fun things together, SP32 Having the support of others, SP33 Belonging.  
16 10 We selected the three highest factor loadings (SP29, SP32, and SP33) and labelled this factor 'Social  
17 11 relations'.

18  
19 12 The second factor showed loadings above .40 on items from the original dimension Daily Functioning  
20 13 (DF). These items are: DF36 Looking after yourself, DF37 Knowing your limitations, DF38 Knowledge  
21 14 of health, DF39 Managing time, DF40 Managing money. We selected the three highest factor  
22 15 loadings (DF37, DF38, DF39) and labelled this factor 'Daily life-management'.

23  
24 16 The third factor showed that loadings above .40 were all strong factor loading ( $\geq .60$ ) on items from  
25 17 the original dimension Bodily Functions (BF). These items are: BF1 Feeling healthy, BF2 Feeling fit,  
26 18 BF5 Eating pattern, BF6 Physical condition, and BF7 Exercise. We included the three items with  
27 19 highest factor loadings (BF2, BF6, and BF7) and labelled this factor 'Physical fitness'.

28  
29 20 The fourth factor showed loadings above .40 on items across three dimensions of the dialogue tool:  
30 21 Mental Well-being (MW), Meaningfulness (MF), and Quality of Life (QL). These items are: MW11  
31 22 Being cheerful, MW12 Accepting yourself, MW14 having control, MF16 Being high spirited, and  
32 23 MF19 Accepting life, QL22 Enjoyment, QL23 Being happy, QL24 Feeling good, and QL25 Feeling well-  
33 24 balanced. We selected the three highest factor loadings (QL23, QL24, and QL25) and labelled this  
34 25 factor 'Contentment'.

35  
36 26 The fifth factor showed loadings above .40 on items from one dimension of the dialogue tool: Mental  
37 27 Wellbeing (MW) and Meaningfulness (MF). These items are: MW13 Being able to handle changes,  
38 28 MF17 Wanting to achieve ideals, MF18 Feeling confident about own future, MF21 Continue learning,  
39 29 and SP34 Doing meaningful things. We selected the three highest factor loadings (MW13, MF17, and  
40 30 MF18) and labelled this factor 'Future perspectives'.

41  
42 31 The last factor showed that loadings above .40 were all strong factor loading ( $\geq .60$ ) on items from  
43 32 one dimension of the dialogue tool: Mental Well-being (MW). These items are: MW8 Being able to  
44 33 remember things and MW9 Being able to concentrate. We selected these two highest factor loadings  
45 34 (MW8 and MW9) and labelled this factor 'Mental functioning', as these aspects solely focus on  
46 35 cognitive abilities and do not concern any emotional aspects or feelings.

47  
48 36 In our exploration for a measurement instrument model, we were successful in reducing the number  
49 37 of items for five factors from 7 to 3 items and for one factor to 2 items. The final factor structure we  
50 38 extracted thus contained 17 items.

51  
52 39

53  
54 39

55  
56 39

57  
58 39

59  
60 39



Table 1. Factor Pattern/Structure Rotated to the Oblimin Criterion

| Item number* | Description                               | Factor 1         | Factor 2         | Factor 3         | Factor 4    | Factor 5            | Factor 6           | $h^2$ |
|--------------|-------------------------------------------|------------------|------------------|------------------|-------------|---------------------|--------------------|-------|
|              |                                           | Social relations | Daily-management | Physical fitness | Contentment | Future achievements | Mental functioning |       |
| <b>BF1</b>   | <b>Feeling healthy</b>                    | -0.03            | 0.05             | <b>0.82</b>      | 0.12        | -0.02               | 0.03               | 0.81  |
| <b>BF2</b>   | <b>Feeling fit</b>                        | -0.04            | 0.03             | <b>0.86</b>      | 0.12        | -0.07               | 0.07               | 0.83  |
| BF3          | Having complaints or pain                 | 0.10             | -0.07            | 0.37             | -0.11       | 0.10                | 0.13               | 0.25  |
| BF4          | Sleeping pattern                          | 0.10             | -0.10            | 0.36             | 0.25        | 0.01                | 0.21               | 0.46  |
| BF5          | Eating pattern                            | 0.17             | -0.01            | 0.43             | 0.12        | 0.04                | 0.13               | 0.52  |
| BF6          | Physical condition                        | 0.09             | -0.02            | <i>0.73</i>      | -0.08       | 0.12                | 0.02               | 0.68  |
| <b>BF7</b>   | <b>Exercise</b>                           | 0.02             | 0.09             | <b>0.74</b>      | -0.17       | 0.16                | -0.01              | 0.70  |
| <b>MW8</b>   | <b>Being able to remember things</b>      | -0.03            | -0.01            | 0.00             | -0.08       | 0.01                | <b>0.95</b>        | 0.82  |
| <b>MW9</b>   | <b>Being able to concentrate</b>          | 0.03             | 0.02             | 0.07             | 0.13        | -0.01               | <b>0.77</b>        | 0.82  |
| MW10         | Being able to communicate                 | 0.10             | 0.36             | 0.08             | -0.22       | 0.22                | 0.20               | 0.49  |
| MW11         | Being cheerful                            | 0.24             | 0.03             | 0.12             | <i>0.46</i> | 0.07                | 0.19               | 0.78  |
| MW12         | Accepting yourself                        | 0.21             | 0.14             | 0.13             | <i>0.46</i> | -0.01               | 0.10               | 0.69  |
| <b>MW13</b>  | <b>Being able to handle changes</b>       | 0.10             | 0.10             | 0.05             | -0.01       | <b>0.48</b>         | 0.11               | 0.51  |
| MW14         | Having control                            | 0.13             | 0.22             | 0.03             | <i>0.42</i> | 0.09                | 0.15               | 0.70  |
| MF15         | Having a meaningful life                  | 0.28             | 0.17             | 0.05             | 0.35        | 0.20                | 0.06               | 0.80  |
| MF16         | Being high-spirited                       | 0.13             | 0.13             | 0.20             | <i>0.41</i> | 0.17                | 0.08               | 0.78  |
| <b>MF17</b>  | <b>Wanting to achieve ideals</b>          | -0.06            | -0.05            | 0.06             | 0.01        | <b>0.87</b>         | 0.07               | 0.77  |
| <b>MF18</b>  | <b>Feeling confident about own future</b> | 0.12             | 0.03             | 0.01             | 0.19        | <b>0.68</b>         | 0.00               | 0.80  |
| MF19         | Accepting life                            | 0.06             | 0.18             | 0.08             | 0.41        | 0.21                | 0.00               | 0.57  |
| MF20         | Being grateful                            | 0.24             | 0.09             | 0.04             | 0.31        | 0.32                | 0.03               | 0.68  |
| MF21         | Continue learning                         | 0.06             | 0.13             | 0.15             | -0.08       | <i>0.43</i>         | 0.05               | 0.43  |
| QL22         | Enjoyment                                 | 0.16             | 0.14             | 0.15             | <i>0.50</i> | 0.19                | 0.00               | 0.83  |
| <b>QL23</b>  | <b>Being happy</b>                        | 0.11             | 0.13             | 0.08             | <b>0.56</b> | 0.17                | 0.06               | 0.79  |
| <b>QL24</b>  | <b>Feeling good</b>                       | 0.09             | 0.07             | 0.16             | <b>0.58</b> | 0.14                | 0.12               | 0.86  |
| <b>QL25</b>  | <b>Feeling well-balanced</b>              | 0.08             | 0.12             | 0.16             | <b>0.56</b> | 0.13                | 0.11               | 0.85  |

|    |             |                                     |             |             |       |       |             |       |      |
|----|-------------|-------------------------------------|-------------|-------------|-------|-------|-------------|-------|------|
| 1  |             |                                     |             |             |       |       |             |       |      |
| 2  |             |                                     |             |             |       |       |             |       |      |
| 3  | QL26        | Feeling safe                        | 0.30        | 0.22        | 0.08  | 0.26  | 0.09        | 0.07  | 0.67 |
| 4  | QL27        | Living conditions                   | 0.37        | 0.13        | 0.02  | 0.26  | 0.09        | 0.04  | 0.57 |
| 5  | QL28        | Having enough money                 | 0.24        | 0.34        | 0.11  | -0.10 | 0.15        | 0.05  | 0.48 |
| 6  | <b>SP29</b> | <b>Social contacts</b>              | <b>0.88</b> | 0.02        | 0.00  | -0.08 | 0.04        | 0.05  | 0.82 |
| 7  | SP30        | Being taken seriously               | 0.66        | 0.17        | -0.10 | -0.03 | 0.15        | 0.05  | 0.72 |
| 8  | SP31        | Doing fun things together           | <i>0.81</i> | -0.02       | 0.08  | 0.07  | 0.03        | -0.05 | 0.77 |
| 9  | <b>SP32</b> | <b>Having the support of others</b> | <b>0.88</b> | 0.03        | -0.01 | 0.02  | -0.09       | 0.05  | 0.76 |
| 10 | <b>SP33</b> | <b>Belonging</b>                    | <b>0.88</b> | -0.04       | 0.03  | 0.08  | 0.01        | -0.02 | 0.84 |
| 11 | SP34        | Doing meaningful things             | 0.21        | 0.12        | 0.04  | 0.12  | <i>0.43</i> | 0.04  | 0.63 |
| 12 | SP35        | Being interested in society         | 0.11        | 0.40        | -0.03 | 0.11  | 0.20        | 0.10  | 0.55 |
| 13 | DF36        | Looking after yourself              | 0.13        | <i>0.68</i> | 0.13  | -0.09 | 0.02        | -0.06 | 0.63 |
| 14 | <b>DF37</b> | <b>Knowing your limitations</b>     | -0.06       | <b>0.88</b> | -0.02 | 0.13  | 0.00        | 0.02  | 0.81 |
| 15 | <b>DF38</b> | <b>Knowledge of health</b>          | 0.08        | <b>0.72</b> | 0.20  | -0.03 | -0.03       | -0.03 | 0.71 |
| 16 | <b>DF39</b> | <b>Managing time</b>                | 0.01        | <b>0.71</b> | -0.07 | 0.14  | -0.01       | 0.17  | 0.72 |
| 17 | DF40        | Managing money                      | 0.13        | <i>0.58</i> | 0.02  | -0.08 | 0.07        | 0.15  | 0.62 |
| 18 | DF41        | Being able to work                  | 0.04        | 0.33        | 0.18  | -0.05 | 0.29        | 0.02  | 0.49 |
| 19 | DF42        | Asking for help                     | 0.18        | 0.20        | 0.01  | -0.11 | 0.16        | 0.24  | 0.36 |
| 20 |             |                                     |             |             |       |       |             |       |      |
| 21 |             |                                     |             |             |       |       |             |       |      |
| 22 |             |                                     |             |             |       |       |             |       |      |
| 23 |             |                                     |             |             |       |       |             |       |      |
| 24 |             |                                     |             |             |       |       |             |       |      |
| 25 |             |                                     |             |             |       |       |             |       |      |
| 26 | % of        |                                     |             |             |       |       |             |       |      |
| 27 | variance    |                                     | 15.1        | 12.8        | 11.2  | 10.9  | 10.3        | 7.2   | 67.5 |

Notes: Coefficients greater than |.40| are italicized. The items in bold are retained for that factor.

\* BF refers to Bodily functions; MW refers to Mental well-being; MF refers to meaningfulness; QL refers to Quality of life; SP refers to Social and societal participation; DF refers to daily functioning

### 1 *Confirmatory Factor Analysis*

2           The two baseline models, against which we compared the factor structure we extracted  
3 during our EFA, had low fits. First, the original 6-factor structure had a CFI of .846, TLI of .835, RMSEA  
4 of .086 with 90% confidence interval (CI) [.082, .089], and an SRMR of 0.063. Second, the 1-factor  
5 structure had a CFI of .731, TLI of .717, RMSEA of .112 with 90% confidence interval (CI) [.109, .115],  
6 and an SRMR of 0.066. The factor structure we extracted during the EFA, in contrast, had an  
7 acceptable fit, with a CFI of .964, TLI of .953, RMSEA of .071 with 90% confidence interval (CI) [.062,  
8 .081], and an SRMR of 0.036. This fit was significantly better than the fit of both the original 6-factor  
9 solution ( $\chi^2(700) = 2604.48, p < .001$ ) and the 1-factor solution ( $\chi^2(715) = 4174.19, p < .001$ ).

10           The items we selected during the EFA all showed positive factor loadings on their respective  
11 domains, with standardized coefficients ranging from .71 to .97 (see Table 2), supporting the factor  
12 structure. As we report in Table 3, the items within each factor yielded highly consistent response.  
13 More specifically, the Cronbach's alpha values of the factors ranged from .82 to .92. The six factors  
14 correlated significantly positively among each other (see Table 3), indicating that individuals that  
15 score higher on one domain typically score higher on the other domains. The factor correlations did  
16 not exceed .80, which suggest acceptable discriminant validity[25]. In comparison, the factor  
17 correlations of the original model suggest overlap between Meaningfulness and Mental well-being,  
18 Mental well-being and Quality of Life, Quality of life and Meaningfulness, Quality of Life and Social  
19 and societal participation, and Social and societal participation and Daily functioning (see Table 4).  
20 Cronbach alpha values from this original model range from .88 to .93.

Table 2. Parameter Estimates Confirmatory Factor Analysis

| Latent factor         | Item | Description                        | B    | SE   | Z     | Beta | p   |
|-----------------------|------|------------------------------------|------|------|-------|------|-----|
| Social relations      | 29   | Social contacts                    | 1.00 | 0.00 |       | 0.84 |     |
| Social relations      | 32   | Having the support of others       | 1.10 | 0.06 | 19.49 | 0.84 | *** |
| Social relations      | 33   | Belonging                          | 1.18 | 0.05 | 21.96 | 0.91 | *** |
| Daily life-management | 37   | Knowing your limitations           | 1.00 | 0.00 |       | 0.89 |     |
| Daily life-management | 38   | Knowledge of health                | 1.05 | 0.04 | 26.52 | 0.93 | *** |
| Daily life-management | 39   | Managing time                      | 1.09 | 0.06 | 19.90 | 0.80 | *** |
| Physical fitness      | 1    | Feeling healthy                    | 1.00 | 0.00 |       | 0.95 |     |
| Physical fitness      | 2    | Feeling fit                        | 1.05 | 0.04 | 24.89 | 0.88 | *** |
| Physical fitness      | 7    | Exercise                           | 1.03 | 0.06 | 17.97 | 0.74 | *** |
| Contentment           | 23   | Being happy                        | 1.00 | 0.00 |       | 0.87 |     |
| Contentment           | 24   | Feeling good                       | 1.10 | 0.04 | 25.95 | 0.94 | *** |
| Contentment           | 25   | Feeling well-balanced              | 1.01 | 0.05 | 22.28 | 0.87 | *** |
| Future perspective    | 13   | Being able to handle changes       | 1.00 | 0.00 |       | 0.71 |     |
| Future perspective    | 17   | Wanting to achieve ideals          | 1.19 | 0.09 | 12.92 | 0.73 | *** |
| Future perspective    | 18   | Feeling confident about own future | 1.32 | 0.09 | 14.90 | 0.86 | *** |
| Mental functioning    | 8    | Being able to remember things      | 1.00 | 0.00 |       | 0.83 |     |
| Mental functioning    | 9    | Being able to concentrate          | 1.15 | 0.06 | 19.53 | 0.97 | *** |

Notes: \*\*\* =  $p < .001$ , B = unstandardized estimates, Beta = standardized estimates.

Table 3. Means, SD, Cronbach's alpha (in correlation matrix diagonal) and correlations of the extracted factors (new model).

1  
2  
3  
4  
5  
6  
7  
8  
9  
10  
11  
12  
13  
14  
15  
16  
17  
18  
19  
20  
21  
22  
23  
24  
25  
26  
27  
28  
29  
30  
31  
32  
33  
34  
35  
36  
37  
38  
39  
40  
41  
42  
43  
44  
45  
46

| <b>Factor</b>             | <b>M</b> | <b>SD</b> | <b>(1)</b> | <b>(2)</b> | <b>(3)</b> | <b>(4)</b> | <b>(5)</b> | <b>(6)</b> |
|---------------------------|----------|-----------|------------|------------|------------|------------|------------|------------|
| (1) Physical fitness      | 7.60     | 1.70      | (.88)      |            |            |            |            |            |
| (2) Mental functions      | 7.76     | 1.58      | .58***     | (.89)      |            |            |            |            |
| (3) Future perspective    | 7.73     | 1.45      | .55***     | .57***     | (.82)      |            |            |            |
| (4) Contentment           | 7.92     | 1.59      | .64***     | .63***     | .73***     | (.92)      |            |            |
| (5) Social relations      | 8.42     | 1.35      | .54***     | .58***     | .64***     | .70***     | (.90)      |            |
| (6) Daily life-management | 8.52     | 1.35      | .57***     | .62***     | .67***     | .69***     | .72***     | (.90)      |

Notes: \*\*\* = p < .001.

For peer review only

Table 4. Means, SD, Cronbach's alpha (in correlation matrix diagonal) and correlations of the original factors (MPH dialogue tool).

| Factor                                | <i>M</i> | <i>SD</i> | (1)    | (2)    | (3)    | (4)    | (5)    | (6)   |
|---------------------------------------|----------|-----------|--------|--------|--------|--------|--------|-------|
| (1) Bodily functions                  | 7.60     | 1.70      | (.88)  |        |        |        |        |       |
| (2) Mental well-being                 | 7.76     | 1.58      | .72*** | (.90)  |        |        |        |       |
| (3) Meaningfulness                    | 7.73     | 1.45      | .65*** | .83*** | (.90)  |        |        |       |
| (4) Quality of life                   | 7.92     | 1.59      | .72*** | .83*** | .88*** | (.92)  |        |       |
| (5) Social and societal participation | 8.42     | 1.35      | .61*** | .77*** | .77*** | .81*** | (.93)  |       |
| (6) Daily functioning                 | 8.52     | 1.35      | .65*** | .79*** | .74*** | .78*** | .82*** | (.90) |

Notes: \*\*\* =  $p < .001$ .

## 1 Discussion

2 The results of our factor analysis support a factor structure of six dimensions. The model we extracted  
3 contained 17 items, comprising the factors Physical fitness, Mental functions, Future perspectives,  
4 Contentment, Social relations, and Daily life-management. The extracted model showed improved  
5 construct validity compared to the original model with good fit, high reliability and acceptable  
6 discriminant validity. For the MPH tool our reliability tests suggest good to very good reliability  
7 (Cronbach alpha values ranging from .88 to .93). Furthermore, our factor analysis suggests overlap across  
8 the dimensions Mental wellbeing, Meaningfulness, Quality of life, and Social and societal participation,  
9 making the MPH tool less suitable as a measurement tool.

10 This study addresses the difference in aims and thereby required properties between a dialogue tool and  
11 a measurement tool. The results show that a 17-item model has better psychometric properties, and can  
12 thereby serve as a strong basis for the development of a Positive Health measure. However, the 17-item  
13 scale neglects several aspects relevant to address when determining and discussing an individual's  
14 perception of health. For example, for bodily functions, the ignored items about sleeping and eating  
15 patterns can inspire ideas and improve dialogue about improving bodily functions. Similarly, it ignores  
16 the aspect *accepting yourself*, whereas this was considered the most important aspect of Mental well-  
17 being by respondents (18-25 years) in a study that focused on the development of an adolescent version  
18 of the tool[36]. Importance of this aspect came forward in studies regarding the development of health-  
19 related quality of life and subjective well-being scales as well[6, 37]. Furthermore, research shows that  
20 poor living conditions and financial problems are often accompanied by considerable physical and  
21 mental problems[38-40]. Inclusion of these aspects in the MPH dialogue tool provides a broader  
22 understanding of the multiple needs of an individual. This enables individuals to express their needs  
23 during the dialogue about the results and enables to refer them, if required, to appropriate providers.  
24 Overall, for two statements within the MPH dialogue tool it can be argued that they also function as  
25 determinants - which influence people's perceived health - like patients themselves expressed during  
26 the original study, or consequences of health as well. While such determinants and consequences of  
27 health are not appropriately represented in the measurement of health itself, we suggest that they may  
28 still be relevant in a dialogue tool.

29 Difficulties to blend the two goals of both a dialogue tool and a measurement tool were noted earlier.  
30 During the development process, an attempt to transform the dimensions and underlying aspects into a  
31 questionnaire that could serve as a validated outcome measurement instrument to measure Positive  
32 Health has failed[21]. At this stage it appeared that the goal of a measurement tool to express outcome  
33 in health in (a) fixed number(-s) was too far from the experienced reality of an individual. Based on the  
34 results of our study and the previous attempt, we therefore suggest the use of two separate tools: (1) a  
35 dialogue tool with the aim to elucidate a broad representation of a person's perceived health status,  
36 comprising a broad range of aspects and (2) a measurement tool with improved psychometric properties  
37 that is able to capture broad health in a valid and reliable way. For this second purpose, our extracted 17-  
38 item model may serve as a basis.

39 When further developing a measurement tool to the measure (positive) health, several issues need to be  
40 addressed. First, concepts like salutogenesis, sense of coherence, and resilience form a strong basis of  
41 Positive Health, focussing on the abilities of individuals to handle changes and experience  
42 meaningfulness. It should be further investigated whether these concepts are sufficiently addressed in

1  
2  
3 1 the current 17-item experimental model. For example, the included aspects from the dimension of  
4 2 Meaningfulness solely focus on future achievements, while meaningfulness can be regarded as an  
5 3 integration of past, present and future[41]. Second, in line with the concept of health as the ability to  
6 4 adapt and to self-manage, one could expect that an individual with poor objective health status can still  
7 5 experience good health when being capable to deal well with the situation, while another individual with  
8 6 better objective health status can experience lower health. It would be a challenge to develop a  
9 7 measurement tool that does not reflect health by one continuum, but that can capture both realities.

### 12 8 *Methodological considerations*

14 9 This study was based on a survey among a citizen panel in eastern part of the Netherlands (Twente), with  
15 10 a mean age of 62 ( $SD = 15$ ) and 46% women. This relatively higher age of the study population compared  
16 11 to the whole adult population in this region (M age = 51) could reflect a higher interest in the topic of  
17 12 personal positive health status in older adults, and may be the result of the relatively low response rate  
18 13 of 22%. To be able to draw more firm conclusions about the psychometric properties of the MPH tool,  
19 14 this should be investigated among other populations as well. This will reveal to which extent difference  
20 15 in age, education level, health literacy and poverty level affects our findings.

23 16 In our study we have focused on the construct validity. Therefore, other psychometric properties such as  
24 17 the predictive validity, discriminant validity, and responsiveness of the 17- item model remain still  
25 18 unknown. Such issues should be addressed in future studies. Also, we made a first attempt to label the  
26 19 identified factors with factor names. The appropriateness of these names should be further investigated  
27 20 as well.

30 21 We based the choice to select three items per factor on both practical and theoretical arguments. From  
31 22 practical point of view, it is desirable to have a short and easy to use scale with acceptable psychometric  
32 23 properties. A scale of 17 items can be completed within a short amount of time. From a theoretical  
33 24 perspective, factors with fewer than three items are often weak and unstable[26]. Due to low factor  
34 25 loadings ( $< .40$ ) we were not able to select a third item for the factor Mental functions. To increase  
35 26 stability within this factor and to improve overall balance of the scale, we suggest to investigate the  
36 27 possibility to develop and include a third item for the factor Mental functions in future studies.

### 39 28 *Conclusion*

41 29 Overall, we conclude that the overall structure of the MPH dialogue tool, seems reliable. While the 42-  
42 30 item model might be suitable as a dialogue tool, this study shows that it is not suitable as a  
43 31 measurement scale. Instead, we propose a 17-item model with a six factor structure, comprising the  
44 32 factors Physical fitness, Mental functions, Future perspective, Contentment, Social relations, and Daily  
45 33 life-management, which can serve as a basis for the development of an additional measurement scale.  
46 34 Given the prevailing healthcare trend towards a focus on health and wellbeing, expressed by an  
47 35 increased number of practices based on a Positive Health approach, the existence of such measurement  
48 36 scale is of great importance.

### 53 38 **Author contributions**



1  
2  
3 1 SB collected the data. BD performed the statistical analysis. MV interpreted the results and wrote the  
4 2 manuscript in collaboration with BD and EA. All authors commented and agreed on the final version.

### 6 3 **Funding Statement**

8 4 This research received no specific grant from any funding agency in the public, commercial or non-profit  
9 5 sector.

### 11 6 **Competing interest**

13 7 The authors declare no conflict of interest.

### 15 8 **Data sharing statement**

17 9 A request for sharing data can be made by sending an email to the corresponding author.

### 19 10 **Acknowledgement**

21 11 We thank all respondents from the GGD Twente citizens' panel for completing our questionnaire.

22 12 Figure 1. Scree plot. Note: Kaiser criterion is shown by the black dashed line.

24 13 Figure 2. Parallel Analysis. Note: The 6-factor structure is shown by the black dashed line.

### 26 14 **References**

- 28 15 1. Johansen F, Loorbach D, Stoopendaal A. Exploring a transition in Dutch healthcare. *J Health Organ*  
29 16 *Manag* 2018;32(7):875-90 doi: 10.1108/JHOM-07-2018-0185.
- 31 17 2. Palmer K, Marengoni A, Forjaz MJ, et al. Multimorbidity care model: Recommendations from the  
32 18 consensus meeting of the Joint Action on Chronic Diseases and Promoting Healthy Ageing across  
33 19 the Life Cycle (JA-CHRODIS). *Health Policy* 2018;122(1):4-11 doi:  
34 20 10.1016/j.healthpol.2017.09.006.
- 35 21 3. Hoeymans N, Van Loon AJM, Van den Berg M, et al. A healthier Netherlands: the key findings of the  
36 22 sixth Public Health Status and Foresight Bilthoven, The Netherlands: National Institute for Public  
37 23 Health and the environment (RIVM), 2014.
- 38 24 4. Barnett K, Mercer SW, Norbury M, Watt G, Wyke S, Guthrie B. Epidemiology of multimorbidity and  
39 25 implications for health care, research, and medical education: A cross-sectional study. *Lancet*  
40 26 2012;380(9836):37-43 doi: 10.1016/S0140-6736(12)60240-2.
- 41 27 5. Butalid L, Verhaak PF, Boeije HR, Bensing JM. Patients' views on changes in doctor-patient  
42 28 communication between 1982 and 2001: a mixed-methods study. *BMC Fam Pract* 2012;13:80  
43 29 doi: 10.1186/1471-2296-13-80.
- 45 30 6. De Vries M, Emons WHM, Plantinga A, et al. Comprehensively Measuring Health-Related Subjective  
46 31 Well-Being: Dimensionality Analysis for Improved Outcome Assessment in Health Economics.  
47 32 *Value Health* 2016;19(2):167-75 doi: 10.1016/j.jval.2015.11.010.
- 48 33 7. Al-Janabi H, Flynn TN, Coast J. Development of a self-report measure of capability wellbeing for adults:  
49 34 the ICECAP-A. *Qual Life Res* 2012;21(1):167-76 doi: 10.1007/s11136-011-9927-2.
- 51 35 8. NWA. Portfolio for research and innovation - Health care research, sickness prevention and treatment.  
52 36 The Hague, 2016.
- 53 37 9. Smid HJ, Wydoodt A. ZonMw signalement over zingeving in zorg: de mens centraal [ZonMW  
54 38 description about meaningfulness in care: focus on the individual]. 2nd edition ed. Den Haag:  
55 39 ZonMw, 2017.

10. Vanderweele TJ. On the promotion of human flourishing. *Proc Natl Acad Sci U S A*, 2017;8148-56 doi: 10.1073/pnas.1702996114.
11. Stucki G, Bickenbach J. Health, Functioning, and Well-being: Individual and Societal. *Arch Phys Med Rehabil* 2019;100(9):1788-92 doi: 10.1016/j.apmr.2019.03.004.
12. Huber M, Knottnerus A, Green L, et al. How should we define health? *BMJ* 2011;343(7817):1-3 doi: 10.1136/bmj.d4163.
13. Editorial. What is health? The ability to adapt. *Lancet* 2009;373(9666):781-81 doi: 10.1016/S0140-6736(09)60456-6.
14. Jadad AR, O'Grady L. How should health be defined? *BMJ* 2008;337:a2900 doi: 10.1136/bmj.a2900.
15. Larson JS. The conceptualization of health. *Med Care Res Rev* 1999;56:123-36 doi: 10.1177/107755879905600201.
16. Smith R. The end of disease and the beginning of health - *BMJ*, 2008.
17. Van der Lucht F, Polder JJ. Towards better health - The Dutch 2010 Public Health Status and Forecasts Report. Bilthoven: RIVM, 2010.
18. Bircher J. Towards a dynamic definition of health and disease. *Med Health Care Philos* 2005;8(3):335-41 doi: 10.1007/s11019-005-0538-y.
19. Kooiker SE. Nederlanders aan het woord over gezondheid en gezond leven. Achtergrond bij VTV 2010 Van Gezond naar Beter [Stories from Dutch citizens about health and healthy living. Background to the Dutch 2010 Public Health Status and Forecasts Report]. Bilthoven: RIVM, 2011.
20. Huber M, van Vliet M, Giezenberg M, et al. Towards a 'patient-centred' operationalisation of the new dynamic concept of health: a mixed methods study. *BMJ open* 2016;6(1):e010091 doi: 10.1136/bmjopen-2015-010091.
21. Prinsen CAC, Terwee CB. Measuring positive health: for now, a bridge too far. *Public Health* 2019;170:70-77 doi: 10.1016/j.puhe.2019.02.024.
22. Al Shamma S, Van den Dries L, Van Wezep M, Wolf J. Ervaringen met de gesprekstool 'Mijn Positieve Gezondheid' [Experiences with the dialogue tool 'My Positive Health']. Nijmegen, 2018:1-40.
23. Hendriks RJP, Spreeuwenberg MD, Drewes HW, Ruwaard D, Baan CA. How to Measure Population Health: An Exploration Toward an Integration of Valid and Reliable Instruments This study was presented as a poster presentation at the International Conference on Integrated Care 2017, held May 8–10, 2017 in Dublin, Ireland. *Popul Health Manag* 2018;21(4):323-30 doi: 10.1089/pop.2017.0097.
24. Linton M, Dieppe P, Medina-Lara A. Review of 99 self-report measures for assessing well-being in adults: exploring dimensions of well-being and developments over time. *BMJ open* 2016;6(7):e010641-e41 doi: 10.1136/bmjopen-2015-010641.
25. Brown TA. Confirmatory factor analysis for applied research. New York, NY: The Guilford Press, 2014.
26. Costello AB, Osborne JW. Best practices in exploratory factor analysis: Four recommendations for getting the most from your analysis. *Pract Assess Res Eval* 2005;10:1-9 doi: 10.1.1.110.9154.
27. Cabrera-Nguyen P. Author Guidelines for Reporting Scale Development and Validation Results in the Journal of the Society for Social Work and Research. *J Soc Social Work Res* 2010;1(2):99-103 doi: 10.5243/jsswr.2010.8.
28. Comrey AL, Lee HB. A First Course in Factor Analysis. Hillsdale, NJ: Lawrence Erlbaum, 1992.
29. Worthington RL, Whittaker TA. Scale development research: A content analysis and recommendations for best practices. *Couns Psychol* 2006;34(6):806-38
30. Kaiser HF. The Application of Electronic Computers to Factor Analysis. *Educ Psychol Meas* 1960;20(1):141-51 doi: 10.1177/001316446002000116.
31. Kaiser HF, Rice J. Little Jiffy, Mark Iv. *Educ Psychol Meas* 1974;34(1):111-17 doi: 10.1177/001316447403400115.
32. Garson GD. Factor Analysis. Asheboro, NC: Statistical Associates Publishers, 2013.

- 1  
2  
3 1 33. Hu L, Bentler PM. Cutoff criteria for fit indexes in covariance structure analysis: Conventional criteria  
4 2 versus new alternatives. *Struct Equ Modeling* 1999;6(1):1-55 doi: 10.1080/10705519909540118.  
5 3 34. Rosseel Y. Lavaan: An R package for structural equation modeling. *J Stat Softw* 2012;48(2):1-36  
6 4 35. Team RC. R: A Language and Environment for Statistical Computing. Vienna: R Foundation for  
7 5 Statistical Computing, 2018.  
8 6 36. Van Vliet M, Van der Zanden S, Huber M. Ontwikkeling van de 'Mijn Positieve Gezondheid'  
9 7 jongerentool [Development of the My Positive Health adolescent tool]. Utrecht: Institute for  
10 8 Positive Health, 2019.  
11 9 37. Pietersma S, de Vries M, van den Akker-van Marle ME. Domains of quality of life: results of a three-  
12 10 stage Delphi consensus procedure among patients, family of patients, clinicians, scientists and  
13 11 the general public. *Qual Life Res* 2014;23(5):1543-56 doi: 10.1007/s11136-013-0578-3.  
14 12 38. Bodden DHM, Deković M. Multiproblem Families Referred to Youth Mental Health: What's in a  
15 13 Name? *Fam Process* 2016;55(1):31-47 doi: 10.1111/famp.12144.  
16 14 39. Moorhead R, Robinson M. A trouble shared – legal problems clusters in solicitors' and advice  
17 15 agencies. London: Department for Constitutional Affairs, 2006.  
18 16 40. Smith M, Buck A, Sidaway J, Scanlan L. Bridging the Empirical Gap: New Insights into the Experience  
19 17 of Multiple Legal Problems and Advice Seeking. *J Empir Leg Stud* 2013;10(1):146-70 doi:  
20 18 10.1111/jels.12006.  
21 19 41. Baumeister RF, Vohs KD, Aaker JL, Garbinsky EN. Some key differences between a happy life and a  
22 20 meaningful life. *J Posit Psychol* 2013;8(6):505-16 doi: 10.1080/17439760.2013.830764.  
23  
24  
25  
26 21  
27  
28 22  
29  
30 23  
31  
32  
33  
34  
35  
36  
37  
38  
39  
40  
41  
42  
43  
44  
45  
46  
47  
48  
49  
50  
51  
52  
53  
54  
55  
56  
57  
58  
59  
60

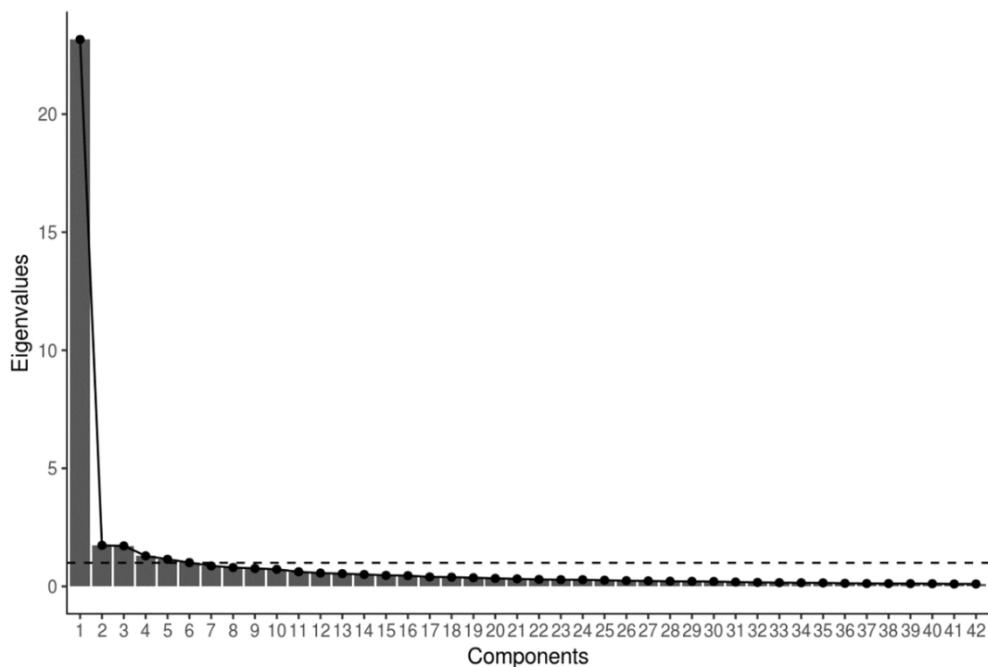

Figure 1. Scree plot. Note: Kaiser criterion is shown by the black dashed line.

141x95mm (220 x 220 DPI)

1  
2  
3  
4  
5  
6  
7  
8  
9  
10  
11  
12  
13  
14  
15  
16  
17  
18  
19  
20  
21  
22  
23  
24  
25  
26  
27  
28  
29  
30  
31  
32  
33  
34  
35  
36  
37  
38  
39  
40  
41  
42  
43  
44  
45  
46  
47  
48  
49  
50  
51  
52  
53  
54  
55  
56  
57  
58  
59  
60

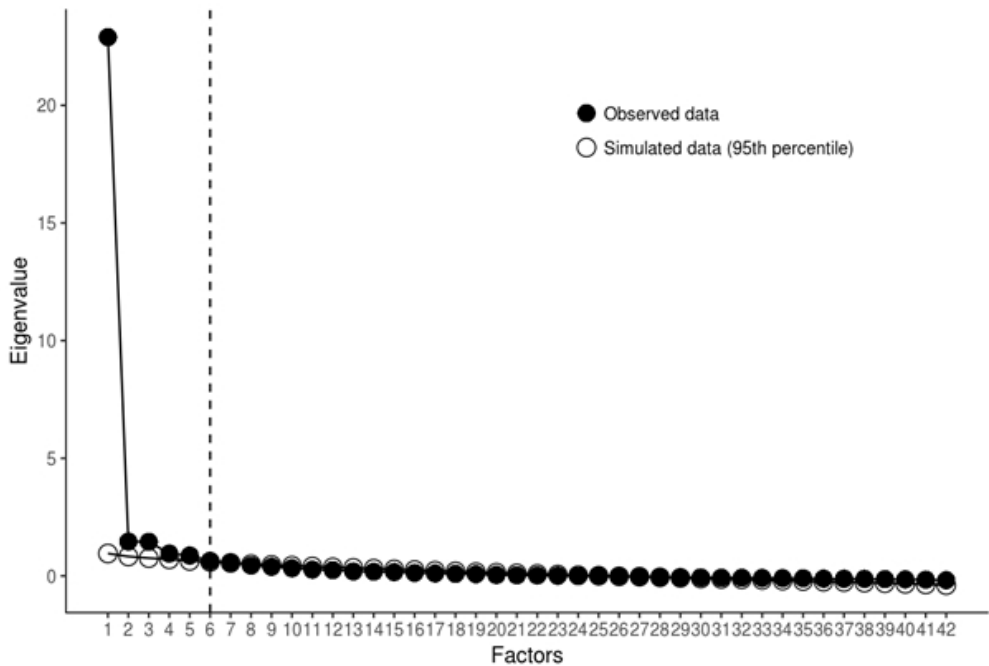

Figure 2. Parallel Analysis. Note: The 6-factor structure is shown by the black dashed line.

160x108mm (96 x 96 DPI)

**MY POSITIVE HEALTH**

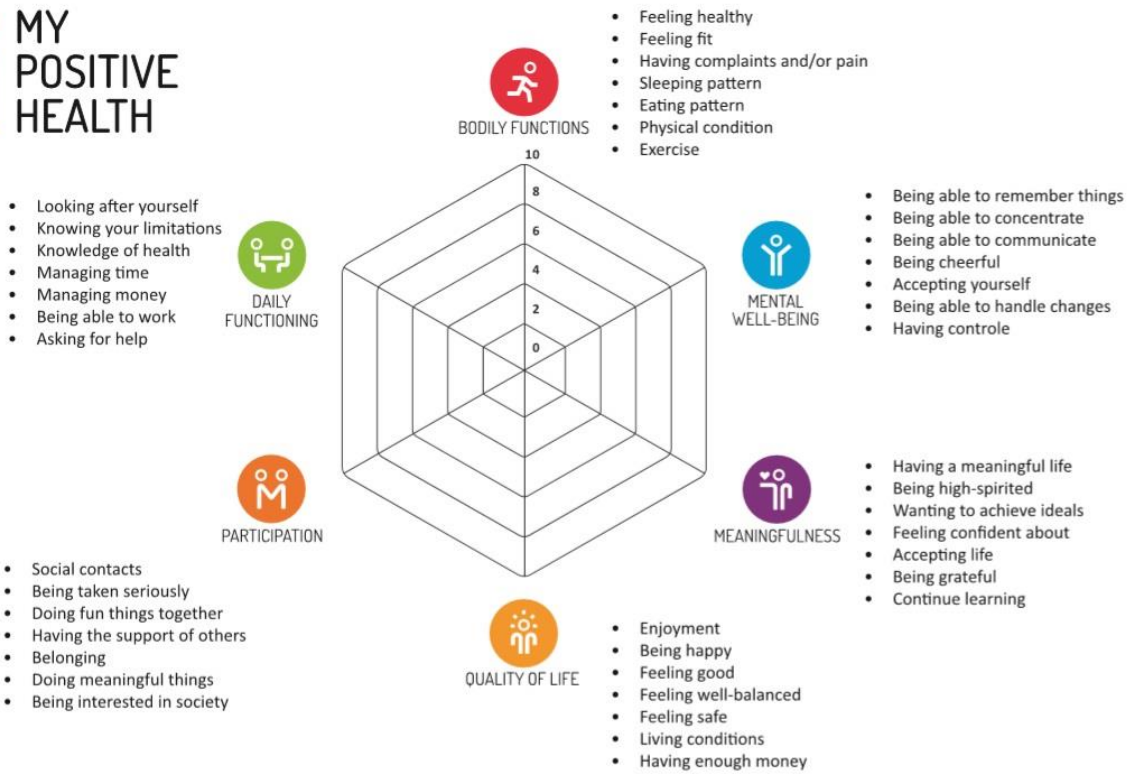

Institute for Positive Health (IPH) | Dialogue tool 1.0

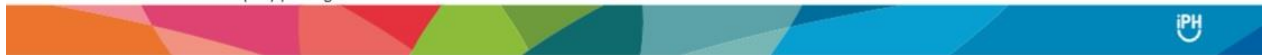

Supplementary file 1. My Positive Health spiderweb comprising 6 dimensions and 42 aspects

1  
2  
3  
4  
5  
6  
7  
8  
9  
10  
11  
12  
13  
14  
15  
16  
17  
18  
19  
20  
21  
22  
23  
24  
25  
26  
27  
28  
29  
30  
31  
32  
33  
34  
35  
36  
37  
38  
39  
40  
41  
42  
43  
44  
45  
46  
47  
48  
49  
50  
51  
52  
53  
54  
55  
56  
57  
58  
59  
60STROBE Statement—Checklist of items that should be included in reports of *cross-sectional studies*

|                                                       | Item No | Recommendation                                                                                                                                                                                                                                                                                                                                                   |
|-------------------------------------------------------|---------|------------------------------------------------------------------------------------------------------------------------------------------------------------------------------------------------------------------------------------------------------------------------------------------------------------------------------------------------------------------|
| <b>Title and abstract</b>                             | 1       | (a) Indicate the study's design with a commonly used term in the title or the abstract <b>p2 / line 1/2</b><br>(b) Provide in the abstract an informative and balanced summary of what was done and what was found <b>p2</b>                                                                                                                                     |
| <b>Introduction</b>                                   |         |                                                                                                                                                                                                                                                                                                                                                                  |
| Background/rationale                                  | 2       | Explain the scientific background and rationale for the investigation being reported <b>p3-4</b>                                                                                                                                                                                                                                                                 |
| Objectives                                            | 3       | State specific objectives, including any prespecified hypotheses <b>p4 line 29 - 34</b>                                                                                                                                                                                                                                                                          |
| <b>Methods</b>                                        |         |                                                                                                                                                                                                                                                                                                                                                                  |
| Study design                                          | 4       | Present key elements of study design early in the paper <b>p4 – line 39-41</b>                                                                                                                                                                                                                                                                                   |
| Setting                                               | 5       | Describe the setting, locations, and relevant dates, including periods of recruitment, exposure, follow-up, and data collection <b>p5 line 6-15</b>                                                                                                                                                                                                              |
| Participants                                          | 6       | (a) Give the eligibility criteria, and the sources and methods of selection of participants <b>p5 line 6-15</b>                                                                                                                                                                                                                                                  |
| Variables                                             | 7       | Clearly define all outcomes, exposures, predictors, potential confounders, and effect modifiers. Give diagnostic criteria, if applicable <b>p5 line n/a</b>                                                                                                                                                                                                      |
| Data sources/ measurement                             | 8*      | For each variable of interest, give sources of data and details of methods of assessment (measurement). Describe comparability of assessment methods if there is more than one group <b>p5 line 1-4</b>                                                                                                                                                          |
| Bias                                                  | 9       | Describe any efforts to address potential sources of bias <b>p5 6-11, p15 9-15</b>                                                                                                                                                                                                                                                                               |
| Study size                                            | 10      | Explain how the study size was arrived at <b>p5 line 22-23</b>                                                                                                                                                                                                                                                                                                   |
| Quantitative variables                                | 11      | Explain how quantitative variables were handled in the analyses. If applicable, describe which groupings were chosen and why <b>p5 line 16 to p6 line 6</b>                                                                                                                                                                                                      |
| Statistical methods<br><b>p5 line 16 to p6 line 7</b> | 12      | (a) Describe all statistical methods, including those used to control for confounding<br>(b) Describe any methods used to examine subgroups and interactions <b>n/a</b><br>(c) Explain how missing data were addressed <b>n/a</b><br>(d) If applicable, describe analytical methods taking account of sampling strategy<br>(e) Describe any sensitivity analyses |
| <b>Results</b>                                        |         |                                                                                                                                                                                                                                                                                                                                                                  |
| Participants                                          | 13*     | (a) Report numbers of individuals at each stage of study—eg numbers potentially eligible, examined for eligibility, confirmed eligible, included in the study, completing follow-up, and analysed <b>p6 line 20-21</b><br>(b) Give reasons for non-participation at each stage <b>n/a</b><br>(c) Consider use of a flow diagram <b>n/a</b>                       |
| Descriptive data                                      | 14*     | (a) Give characteristics of study participants (eg demographic, clinical, social) and information on exposures and potential confounders <b>p6 line</b>                                                                                                                                                                                                          |

|                                                                                  |     |       |                                                                                                                                                                                                              |
|----------------------------------------------------------------------------------|-----|-------|--------------------------------------------------------------------------------------------------------------------------------------------------------------------------------------------------------------|
|                                                                                  |     | 19-27 |                                                                                                                                                                                                              |
|                                                                                  |     |       | (b) Indicate number of participants with missing data for each variable of interest <i>n/a</i>                                                                                                               |
| Outcome data                                                                     | 15* |       | Report numbers of outcome events or summary measures                                                                                                                                                         |
| Main results                                                                     | 16  |       | (a) Give unadjusted estimates and, if applicable, confounder-adjusted estimates and their precision (eg, 95% confidence interval). Make clear which confounders were adjusted for and why they were included |
| Different since factor analysis was performed. Results p6 line 29 to p10 line 20 |     |       | (b) Report category boundaries when continuous variables were categorized                                                                                                                                    |
|                                                                                  |     |       | (c) If relevant, consider translating estimates of relative risk into absolute risk for a meaningful time period                                                                                             |
| Other analyses                                                                   | 17  |       | Report other analyses done—eg analyses of subgroups and interactions, and sensitivity analyses                                                                                                               |
| <b>Discussion</b>                                                                |     |       |                                                                                                                                                                                                              |
| Key results p14 line 2-9                                                         | 18  |       | Summarise key results with reference to study objectives                                                                                                                                                     |
| Limitations p15 line 9-27                                                        | 19  |       | Discuss limitations of the study, taking into account sources of potential bias or imprecision. Discuss both direction and magnitude of any potential bias                                                   |
| Interpretation p 14 line 10 to p15 line 7                                        | 20  |       | Give a cautious overall interpretation of results considering objectives, limitations, multiplicity of analyses, results from similar studies, and other relevant evidence                                   |
| Generalisability p15 line 9-15                                                   | 21  |       | Discuss the generalisability (external validity) of the study results                                                                                                                                        |
| <b>Other information</b>                                                         |     |       |                                                                                                                                                                                                              |
| Funding p 16 line 4-5                                                            | 22  |       | Give the source of funding and the role of the funders for the present study and, if applicable, for the original study on which the present article is based                                                |

\*Give information separately for exposed and unexposed groups.

**Note:** An Explanation and Elaboration article discusses each checklist item and gives methodological background and published examples of transparent reporting. The STROBE checklist is best used in conjunction with this article (freely available on the Web sites of PLoS Medicine at <http://www.plosmedicine.org/>, Annals of Internal Medicine at <http://www.annals.org/>, and Epidemiology at <http://www.epidem.com/>). Information on the STROBE Initiative is available at [www.strobe-statement.org](http://www.strobe-statement.org).
