# Supplementary figures and images for: Development and psychometric evaluation of a Positive Health measurement scale: a factor analysis study based on a Dutch population
Source: PubMed Central journal article supplement — BMJ Open. 2021 Feb 5;11(2):e040816. doi: 10.1136/bmjopen-2020-040816 (PMC7925905; doi:10.1136/bmjopen-2020-040816), 2021-02-05

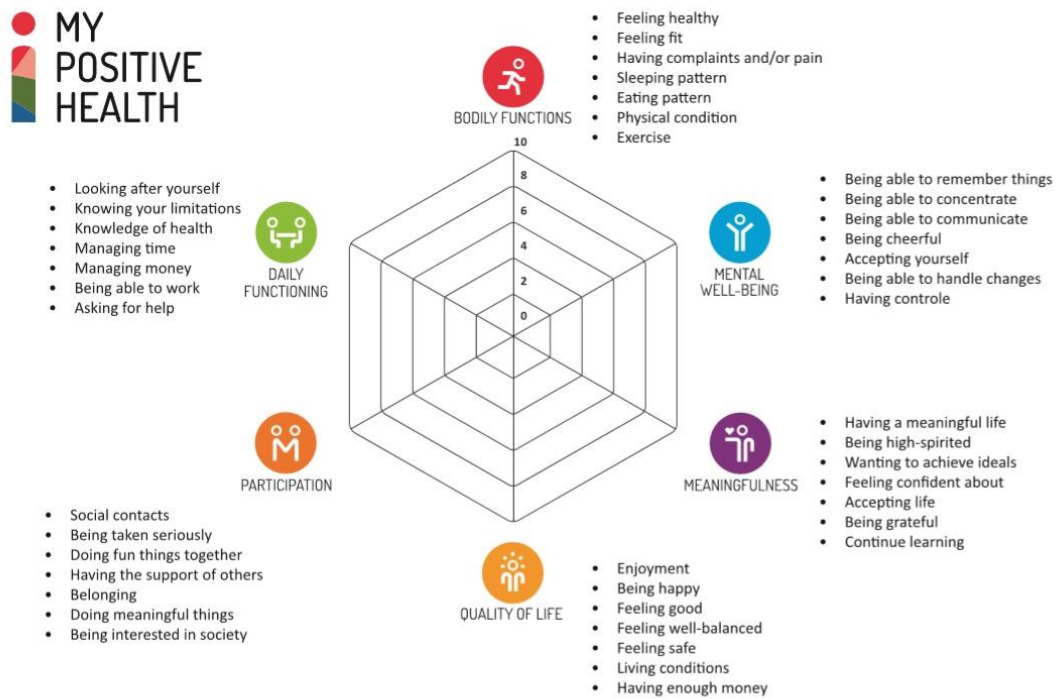

Supplementary file 1. My Positive Health spiderweb comprising 6 dimensions and 42 aspects

Supplement: bmjopen-2020-040816supp001.pdf [file bmjopen-2020-040816supp001.pdf]
